# Supplementary material
Source: Research Square preprint supplement (doi:10.21203/rs.3.rs-10141341/v1)
Supplement: Supplementary file 1 [file ec468de19412c57c0a38804f.pdf]

# Contents

## A Supplementary methods A: preparedness and response costs, and vaccine

### delivery 46

#### A.1 Preparedness costs . . . . . 46

##### A.1.1 BPSV advance R&D . . . . . 46

##### A.1.2 BPSV investigational reserve . . . . . 47

##### A.1.3 SSV capacity reservation . . . . . 48

##### A.1.4 Enabling activities . . . . . 49

#### A.2 Response cost equation . . . . . 49

##### A.2.1 Risk-adjusted R&D cost per candidate calculation . . . . . 50

###### A.2.1.1 SSV . . . . . 50

###### A.2.1.2 BPSV . . . . . 51

##### A.2.2 Procurement cost calculation . . . . . 51

###### A.2.2.1 SSV . . . . . 52

###### A.2.2.2 BPSV . . . . . 52

##### A.2.3 Delivery Cost Equation . . . . . 52

###### A.2.3.1 SSV . . . . . 52

###### A.2.3.2 BPSV . . . . . 53

#### A.3 SSV delivery . . . . . 54

##### A.3.1 Timing . . . . . 55

##### A.3.2 Production . . . . . 55

##### A.3.3 Allocation . . . . . 57

##### A.3.4 Delivery . . . . . 60

#### A.4 BPSV delivery . . . . . 61

##### A.4.1 Timing . . . . . 61

##### A.4.2 Production . . . . . 61

#### A.5 Data for the cost model . . . . . 61

|     |                                                                                |           |
|-----|--------------------------------------------------------------------------------|-----------|
| 924 | <b>B Supplementary methods B: modelling impacts of advance vaccine invest-</b> |           |
| 925 | <b>ments</b>                                                                   | <b>69</b> |
| 926 | B.1 Framing . . . . .                                                          | 69        |
| 927 | B.2 Aggregating epidemics to pandemics . . . . .                               | 69        |
| 928 | B.3 Exceedance probabilities . . . . .                                         | 72        |
| 929 | B.4 Data for the impact model . . . . .                                        | 75        |
| 930 | <b>C Supplementary results</b>                                                 | <b>76</b> |
| 931 | C.1 Results for costs of preparedness and response investments . . . . .       | 76        |
| 932 | C.1.1 Preparedness costs . . . . .                                             | 76        |
| 933 | C.1.2 Cumulative preparedness costs over time . . . . .                        | 76        |
| 934 | C.1.3 Vaccine delivery . . . . .                                               | 78        |
| 935 | C.1.4 Full results for preparedness and response costs . . . . .               | 82        |
| 936 | C.2 Impact of preparedness and response investments . . . . .                  | 85        |
| 937 | C.2.1 Results for the epidemic library . . . . .                               | 85        |
| 938 | C.2.1.1 Societal losses under alternative sector-closure policies among        |           |
| 939 | epidemic library candidates . . . . .                                          | 85        |
| 940 | C.2.1.2 Societal losses under the loss-minimising sector closure policy        |           |
| 941 | in the epidemic library . . . . .                                              | 89        |
| 942 | C.2.1.3 Societal losses averted by advance vaccine investments under           |           |
| 943 | the loss-minimising sector closure policy in the epidemic library              | 90        |
| 944 | C.2.2 Exceedance probabilities . . . . .                                       | 92        |
| 945 | C.2.3 Losses under business as usual . . . . .                                 | 94        |
| 946 | C.2.4 Impact of advance investments into vaccines . . . . .                    | 94        |
| 947 | C.2.5 Supplementary figures for the impact model . . . . .                     | 98        |
| 948 | C.2.5.1 Composition of estimated impacts . . . . .                             | 100       |

# A Supplementary methods A: preparedness and response costs, and vaccine delivery

This section provides equations for the costing and delivery computations. Notation, values, distributions and data sources are summarised in Table A.5.

## A.1 Preparedness costs

We can write the total preparedness cost for scenario  $s$  in year  $y$ , with discount rate  $r$ , as

$$D_{s,y}^{(\text{prep})} = \frac{1}{(1+r)^y} \left( D_s^{(\text{BP-adRD})} + D_{s,y}^{(\text{BP-sec})} + D_{s,y}^{(\text{BP-inv})} + D_s^{(\text{S-cap})} + D_{s,y}^{(\text{en})} \right)$$

where:

- $D_s^{(\text{BP-adRD})}$  is the R&D cost of BPSV prior to an outbreak; see Equation (1)
- $D_{s,y}^{(\text{BP-sec})}$  is the upfront cost of securing an investigational reserve of 100,000 BPSV doses; see Equation (2)
- $D_{s,y}^{(\text{BP-inv})}$  is the annual cost of maintaining an investigational reserve of 100,000 BPSV doses; see Equation (3)
- $D_s^{(\text{S-cap})}$  is the cost of reserved capacity for SSV; see Equation (4)
- $D_{s,y}^{(\text{en})}$  is the annual cost of enabling activities; see Equation (5).

We use  $s = 0$  to denote the business as usual (BAU) scenario, and  $s = 1$  for scenario S01,  $s = 2$  for scenario S02, and so on.

### A.1.1 BPSV advance R&D

Advance R&D for BPSVs consists of Phase 0 (which we use to denote preclinical R&D), Phase 1 and Phase 2, for which we add up costs that depend on (a) the number of candidates, (b) the cost per phase for experienced (those with licensure experience) and inexperienced developers (those without), and (c) the probability of success in each phase. The final cost, therefore, reflects the number of candidates that progressed through the developmental pipeline.

In order to achieve one successful BPSV candidate in the event of an outbreak, we assume that 14 are required to enter into preclinical R&D.<sup>1</sup> At present, there are seven (Table A.1). We

973 assume that the remaining seven will come from developers without prior licensure experience.

974 Probabilities of success for Phase 0 and Phase 1 are  $P_0^{(\text{BPSV})}$  and  $P_1^{(\text{BPSV})}$ . The probability  
 975 of phase occurrence for Phase  $i$  is:

$$\hat{P}_i^{(\text{BPSV})} = \begin{cases} 1 & i = 0 \\ \prod_{j=0}^{i-1} P_j^{(\text{BPSV})} & i \in \{1, 2\} \end{cases}$$

976 The cost of each phase is  $T_i$ , a weighted average of costs of experienced ( $T_i^{(e)}$ ) and  
 977 inexperienced ( $T_i^{(n)}$ ) manufacturers. Assuming that  $N^{(\text{BPSV})} = 14$  candidates start in the  
 978 preclinical phase,<sup>1</sup> and two have prior experience with licensure (Table A.1), we take  $\omega = 0.92$ ;

$$T_i = (1 + \pi) \left( \omega T_i^{(n)} + (1 - \omega) T_i^{(e)} \right)$$

979 where  $\pi = 0.28$  is inflation from 2018 to 2025.<sup>2</sup> Then the total weighted cost for phases 0  
 980 through 2 for  $N^{(\text{BPSV})}$  candidates is

$$D_s^{(\text{BP-adRD})} = \begin{cases} N^{(\text{BPSV})} \sum_{i=0}^2 \hat{P}_i^{(\text{BPSV})} T_i & s = 1 \\ 0 & s \neq 1 \end{cases} \quad (1)$$

Table A.1: Manufacturers working on BPSV and whether or not they have licensure experience as of February 2026.<sup>1</sup>

| Developer               | Licensure Experience |
|-------------------------|----------------------|
| Bharat/U Syd/ExcellGene | Yes                  |
| CPI/CalTech             | No                   |
| Intravacc               | No                   |
| IVI consortium          | No                   |
| Panacea/THSTI           | No                   |
| SK Bio                  | Yes                  |
| VIDO                    | No                   |

### 981 A.1.2 BPSV investigational reserve

982 Denoting the duration of Phase  $i$  as  $Y_i^{(B)}$ , the time taken to complete development of the BPSV  
 983 up to the end of Phase 2, from which point it is manufactured to be held in an investigational

984 reserve, is:

$$Y^{(B)} = Y_0^{(B)} + Y_1^{(B)} + Y_2^{(B)}.$$

985 The upfront cost of securing the investigational reserve is

$$D_{s,y}^{(\text{BP-sec})} = \begin{cases} A_4 A_5 & s = 1 \ \& \ y = Y^{(B)} + 1 \\ 0 & s \neq 1 \ \parallel \ y \neq Y^{(B)} + 1 \end{cases} \quad (2)$$

986 where  $A_4 = 100,000$  is the size of the reserve and  $A_5 = 0.113$  is the cost per dose in USD,  
 987 coming from the upfront cold-chain equipment cost estimate of 138 million USD for 1.2 billion  
 988 doses.<sup>3</sup>

989 The cost of goods sold (COGS) is  $G = 4.68$  USD per dose. Fill/finish costs from Kis<sup>4</sup>  
 990 of 0.29 and 0.39 USD per dose respectively for Moderna and Pfizer doses translate to 7.2%  
 991 of COGS on average. Then the cost of drug substance, accounting for the fill/finish margin  
 992  $M_f = 0.072$  and the profit margin  $M_p = 0.2$ , is  $G(1 - M_f)(1 + M_p) = 5.21$  USD per dose.

993 The reserve is replenished every  $Y_{rep} = 3$  years based on the storage characteristics for  
 994 Ervebo.<sup>5</sup> Then the annual cost to maintain the reserve of  $A_4 = 100,000$  doses is

$$D_{s,y}^{(\text{BP-inv})} = \begin{cases} \frac{A_4}{Y_{rep}} G(1 - M_f)(1 + M_p) + A_1 A_4 & s = 1 \ \& \ y > Y^{(B)} \\ 0 & s \neq 1 \ \parallel \ y \leq Y^{(B)} \end{cases} \quad (3)$$

995 where  $A_1 = 0.01$  USD is the annual reservation cost per dose, coming from the recurring  
 996 cold-chain cost estimate of 12 million USD for 1.2 billion doses.<sup>3</sup>

### 997 **A.1.3 SSV capacity reservation**

998 Reservation sizes, in billions, depend on scenarios. It includes the  $A_3 = 0.5$  billion doses  
 999 reserved for HIC (325 million for the EU,<sup>6</sup> and 150 million for the USA,<sup>7</sup> rounded up to 0.5  
 1000 billion for simplicity of presentation). The cost of the EU reservation is 160 million EUR per  
 1001 year;<sup>8</sup> assuming an exchange rate of 1.08, the cost per dose per year is  $A_2 = 0.53$  USD. We  
 1002 define the scenario-dependent total reservation size as:

$$M_{R,s} = \begin{cases} A_3 & s \in \{0, 1, 4, 7, 10\} \\ A_3 + 0.7 & s \in \{2, 5, 8\} \\ A_3 + 2 & s \in \{3, 6, 9\} \end{cases}$$

1003 Then the total cost per year is

$$D_s^{(\text{S-cap})} = M_{R,s} A_2 \quad (4)$$

1004 The annual costs in billion USD are 0.27, 0.64, and 1.33, respectively.

### 1005 A.1.4 Enabling activities

1006 Denote the target “days to SSV” by  $\zeta$ , so that  $\zeta \in \{365, 200, 100\}$ , which are the three variations  
 1007 we consider enabling activities might achieve. We assume that  $Y^{(200)} = 5$  years are required  
 1008 to achieve 200 days to SSV, and  $Y^{(100)} = 15$  years are required to achieve 100 days to SSV.  
 1009 Then annual costs,  $E = 700$  million USD, accumulate depending on the year and the target:

$$D_{s,y}^{(\text{en})} = \begin{cases} E & \zeta(s) = 200 \ \& \ y \leq Y^{(200)} \mid \zeta(s) = 100 \ \& \ y \leq Y^{(100)} \\ 0 & \zeta(s) = 365 \mid y > Y^{(100)} \mid \zeta(s) = 200 \ \& \ y > Y^{(200)} \end{cases} \quad (5)$$

1010 We use  $\zeta(s)$  to denote the mapping from our scenario definitions to their respective  $\zeta$  values  
 1011 as follows:

$$\zeta(s) = \begin{cases} 365 & s \in \{0, 1, 2, 3, 10\} \\ 200 & s \in \{4, 5, 6\} \\ 100 & s \in \{7, 8, 9\} \end{cases}$$

## 1012 A.2 Response cost equation

1013 We write total response costs as

$$D_{s,y}^{(\text{res})} = \frac{1}{(1+r)^y} \left( D_s^{(\text{S-RD})} + D_s^{(\text{BP-resRD})} + D_{s,y}^{(\text{S-proc})} + D_s^{(\text{BP-proc})} + D_{s,y}^{(\text{S-del})} + D_{s,y}^{(\text{BP-del})} \right)$$

1014 where

- 1015 •  $D_s^{(\text{S-RD})}$  is the R&D cost for SSV; see Equation (6)
- 1016 •  $D_s^{(\text{BP-resRD})}$  is the R&D cost of BPSV after an outbreak; see Equation (7)
- 1017 •  $D_{s,y}^{(\text{S-proc})}$  is the cost of procuring SSV; see Equation (8)
- 1018 •  $D_s^{(\text{BP-proc})}$  is the cost of procuring BPSV; see Equation (9)
- 1019 •  $D_{s,y}^{(\text{S-del})}$  is the cost of delivering SSV; see Equation (10)
- 1020 •  $D_{s,y}^{(\text{BP-del})}$  is the cost of delivering BPSV; see Equation (11)

1021 We present computation for this cost with reference to the beginning of the outbreak.  
1022 Therefore, indices  $y$  in this section do not correspond to the same index in the previous section,  
1023 where  $y$  indexed years of investment pre-pandemic.

## 1024 A.2.1 Risk-adjusted R&D cost per candidate calculation

1025 **A.2.1.1 SSV** Trial costs are adjusted for the duration of the trial, which depend on the  
1026 R&D enabling investment, denoted  $\zeta \in \{365, 200, 100\}$ :

$$T_{\zeta,i}^{(e)} = (1 + \pi) \frac{W_i^{(\zeta)}}{52Y_i^{(B)}} T_i^{(e)}$$

1027 where  $\pi = 0.28$  is inflation from 2018 to 2025,  $T_i^{(e)}$  is the cost per Phase  $i$  of experienced  
1028 developers (i.e. we assume only experienced manufacturers undertake reactive R&D),  $Y_i^{(B)}$  is  
1029 the usual phase duration in normal times in years, and  $W_i^{(\zeta)}$  is its expected duration in weeks  
1030 given enabling investments made prior to the outbreak.

1031 The probability of success of each phase comes from COVID-19 data:<sup>9</sup>

$$P_i^{(\text{SSV})} \sim \text{Beta} \left( \sum_{j=i+1}^4 X_j + 1, X_i + 1 \right)$$

1032 for  $i \in \{0, 1, 2, 3\}$  where  $X_i$  is the number of candidates that failed in phase  $i$ ,  $\sum_{j=i+1}^4 X_j$   
1033 the number that failed after phase  $i$  (and therefore succeeded in phase  $i$ ), and  $X_4$  the number  
1034 that succeeded to licensure.

1035 The probabilities of phase occurrence are:

$$\hat{P}_i^{(SSV)} = \begin{cases} 1 & i = 0 \\ \prod_{j=0}^{i-1} P_j^{(SSV)} & i \in \{1, 2, 3, 4\} \end{cases}$$

1036 Then the total cost is

$$D_s^{(S-RD)} = N^{(SSV)} \left( \sum_{i=0}^3 \hat{P}_i^{(SSV)} \cdot T_{\zeta(s),i}^{(e)} + \hat{P}_4^{(SSV)} T_4 \right) \quad (6)$$

1037 where  $T_4$  is the cost of licensure. We multiply by the number of candidates,  $N^{(SSV)}$ , to get  
1038 the total cost from the weighted average per candidate, where

$$N^{(SSV)} = n^{(SSV)} + F_{NegBin}^{-1} \left( Q^{(SSV)}; n^{(SSV)}, \hat{P}_4^{(SSV)} \right)$$

1039 is chosen to secure at least  $n^{(SSV)} = 5$  successful candidates with probability  $Q^{(SSV)} = 90\%$ .  
1040 Here,  $F_{NegBin}^{-1}(q; n, p)$  is the cumulative density of a negative binomial distribution with  
1041 parameters  $n$  and  $p$  evaluated at quantile  $q$ .

1042 **A.2.1.2 BPSV** One BPSV candidate that has passed through phases 0 to 2 prior to the  
1043 outbreak goes through Phase 3 during the response. The duration is  $W_3^{(365)} = 18$  weeks. Thus  
1044 we write the BPSV R&D response cost

$$D_s^{(BP-resRD)} = \begin{cases} \left( (1 + \pi) \frac{W_3^{(365)}}{52Y_3^{(B)}} T_3^{(e)} + T_4 \right) & s = 1 \\ 0 & s \neq 1 \end{cases} \quad (7)$$

## 1045 A.2.2 Procurement cost calculation

1046 The cost per dose comes from the cost of goods sold (COGS),  $G = 4.68$  USD, adjusted  
1047 for a profit margin ( $M_p = 0.2$ ) and transportation margin ( $M_t = 0.1$ ). The 20% profit  
1048 margin is at the top of range in U.S. Government Accountability Office,<sup>10</sup> and thus acts as  
1049 a conservative estimate on profit margins sought by pharmaceutical companies. The 10%  
1050 estimate for transportation from manufacturer to country isolates the transportation cost from  
1051 the process of vaccination.<sup>11</sup>

1052  $S_R = G(1 + M_p)(1 + M_t)$  evaluates to 6.18 USD.

1053 This cost is used both for SSV doses procured via reserved capacity, and all newly manu-  
 1054 factured BPSV doses.

1055 **A.2.2.1 SSV** We denote  $A_{x,s,y}$  to be the number of doses (in billions) produced from  
 1056 channel  $x$  in year  $y$  and scenario  $s$ , where  $x \in \{R, E, B\}$ , corresponding to reserved, existing  
 1057 (and unreserved), and reactively built capacity, respectively.  $A_{x,s,y}$  comes from Equation (12).  
 1058 Then the total cost, in billion USD, is:

$$D_{s,y}^{(S\text{-proc})} = A_{R,s,y}S_R + \sum_{x \in \{E,B\}} A_{x,s,y}S_U \quad (8)$$

1059 Here,  $S_R = 6.18$  is the cost per reserved dose and  $S_U = 18.94$  the cost per unreserved dose  
 1060 in USD.

1061 **A.2.2.2 BPSV** The cost of BPSV doses is the sum of new doses supplied,  $A_{BPSV,s}$ , at  
 1062 the reserved-capacity cost per dose, and the doses held in the investigational reserve, for which  
 1063 fill/finish, transport and profit margin costs are due.

$$D_s^{(BP\text{-proc})} = \begin{cases} A_{BPSV,s} \cdot S_R + A_4(M_f + M_t)(1 + M_p)G & s = 1 \\ 0 & s \neq 1 \end{cases} \quad (9)$$

1064 For a world population aged 65 and over of 0.85 billion, a coverage of 80% (accounting for  
 1065 wastage of 10%), and a cost per dose of  $S_R = 6.18$  USD (the same as for SSV via reserved  
 1066 capacity), the procurement cost for BPSV is 4.67 billion USD.

## 1067 **A.2.3 Delivery Cost Equation**

1068 **A.2.3.1 SSV** For populations aged 15 and above,  $N_i^{(15)}$  for income group  $i$ , we write

$$L_i = 2 \cdot \lambda \cdot N_i^{(15)} / (1 - \delta)$$

1069 as the total demand for first-schedule doses for income group  $i \in \{\text{LIC, LMIC, UMIC, HIC}\}$ ,  
 1070 representing two doses each for  $\lambda = 80\%$  of the population and  $\delta = 10\%$  wastage.

1071 We write the delivery cost  $H_{s,i,w}$  for  $h_{s,i,w}$  doses given in week  $w$  and income group  $i$  as  
 1072 follows. There are three cost tiers, the first of which,  $V_{i;0}$ , is applied to the first 10% of  $L_i$  (the

1073 “start up” cost); the second ( $V_{i;11}$ ) to the subsequent 20% (the “ramp up” cost); and the third  
 1074 ( $V_{i;31}$ ) to all doses thereafter (the “at scale” cost). The same costing schedule applies both to  
 1075 the first-schedule plus booster SSV doses and the BPSV rollout.

$$H_{s,i,w} = \begin{cases} V_{i;0}h_{s,i,w} & \sum_{j=1}^{w-1} h_{s,i,w} \leq \frac{1}{10}L_i \\ V_{i;10}h_{s,i,w} & \frac{1}{10}L_i < \sum_{j=1}^{w-1} h_{s,i,w} \leq \frac{3}{10}L_i \\ V_{i;30}h_{s,i,w} & \frac{3}{10}L_i < \sum_{j=1}^{w-1} h_{s,i,w} \end{cases}$$

1076 Then the delivery cost in year  $y$  and scenario  $s$  is

$$D_{s,y}^{(S\text{-del})} = \sum_{w \in y} \sum_i H_{s,i,w} \quad (10)$$

1077 **A.2.3.2 BPSV** For the BPSV, which goes only to people aged 65 or older, with popula-  
 1078 tions  $N_i^{(65)}$ , coverage is reached earlier in the process, so the cost is weighted more heavily  
 1079 towards start up and ramp up:

$$D_s^{(BP\text{-del})} = \begin{cases} \sum_i D_{\text{BPSV},i} & s = 1 \\ 0 & s \neq 1 \end{cases} \quad (11)$$

$$D_{\text{BPSV},i} = \begin{cases} N_i^{(65)}V_{i;0} & N_i^{(65)} \leq \frac{1}{10}N_i^{(15)} \\ \frac{N_i^{(15)}}{10}V_{i;0} + \left(N_i^{(65)} - \frac{N_i^{(15)}}{10}\right)V_{i;11} & \frac{1}{10}N_i^{(15)} < N_i^{(65)} \leq \frac{3}{10}N_i^{(15)} \\ \frac{N_i^{(15)}}{10}V_{i;0} + \frac{2}{10}N_i^{(15)}V_{i;11} + \left(N_i^{(65)} - \frac{3}{10}N_i^{(15)}\right)V_{i;31} & N_i^{(65)} > \frac{3}{10}N_i^{(15)} \end{cases}$$

1080 The logic of this is as follows:

- 1081 • The increments in cost correspond to numbers of eligible people in the whole population,  
 1082 namely those aged 15 and above.
- 1083 • If the number of people eligible for the BPSV is less than 10% of the population aged 15  
 1084 and over, then all doses cost the “start up” amount.
- 1085 • If the number of people eligible for the BPSV is more than 10% and less than 30% of  
 1086 the 15+ population, then the cost of the first doses, a number equal to 10% of the 15+

1087 population, is the “start up” amount. All remaining doses cost the “ramp up” amount.  
 1088 • If the number of people eligible for the BPSV is more than 30% of the 15+ population,  
 1089 then the cost of the first doses, a number equal to 10% of the 15+ population, is the  
 1090 “start up” amount. The cost of the second tranche of doses, a number equal to 20% of  
 1091 the 15+ population, is the “ramp up” amount. All remaining doses cost the “at scale”  
 1092 amount.

Table A.2: Literature review of global and country-specific delivery costs

| Country                            | Country status | Study type | Financial cost per dose (USD) | Source                         |
|------------------------------------|----------------|------------|-------------------------------|--------------------------------|
| WHO, Gavi, and UNICEF AMC Estimate | AMC            | Top down   | 1.66                          | Griffiths et al. <sup>3</sup>  |
| UNICEF Global Estimate             | All            | Model      | 0.73                          | Oyatoye <sup>12</sup>          |
| DRC                                | LIC            | Bottom up  | 1.91                          | Moi et al. <sup>13</sup>       |
| Malawi                             | LIC            | Bottom up  | 4.55                          | Ruisch et al. <sup>14</sup>    |
| Mozambique                         | LIC            | Bottom up  | 0.5                           | Namalela et al. <sup>15</sup>  |
| Uganda                             | LIC            | Bottom up  | 0.79                          | Tumusiime et al. <sup>16</sup> |
| Bangladesh                         | LMIC           | Bottom up  | 0.29                          | Yesmin et al. <sup>17</sup>    |
| Cote d’Ivoire                      | LMIC           | Bottom up  | 0.67                          | Vaughan et al. <sup>18</sup>   |
| Nigeria                            | LMIC           | Bottom up  | 0.84                          | Noh et al. <sup>19</sup>       |
| Philippines                        | LMIC           | Bottom up  | 2.16                          | Banks et al. <sup>20</sup>     |
| Vietnam                            | LMIC           | Bottom up  | 1.73                          | Nguyen et al. <sup>21</sup>    |
| Ghana                              | LMIC           | CVIC tool  | 2.2–2.3                       | Nonvignon et al. <sup>22</sup> |
| Lao PDR                            | LMIC           | CVIC tool  | 0.79–0.81                     | Yeung et al. <sup>23</sup>     |
| Kenya                              | LMIC           | Top down   | 3.29–4.28                     | Orangi et al. <sup>24</sup>    |
| Botswana                           | UMIC           | Mixed      | 19                            | Vaughan et al. <sup>25</sup>   |
| South Africa                       | UMIC           | Top down   | 3.84                          | Edoka et al. <sup>26</sup>     |

### 1093 A.3 SSV delivery

Table A.3: Manufacturing response timeline assumptions

| Category                    | Reserved capacity               | Private response (existing capacity) | Private response (built capacity) |
|-----------------------------|---------------------------------|--------------------------------------|-----------------------------------|
| Annual manufacturing volume | By scenario (0.5–2.5B)          | 9B minus reserved volume             | 6B                                |
| Facility transition start   | 7 weeks before vaccine approval | 7 weeks before vaccine approval      | 7 weeks before vaccine approval   |

| Category                        | Reserved capacity | Private response (existing capacity) | Private response (built capacity) |
|---------------------------------|-------------------|--------------------------------------|-----------------------------------|
| Weeks to initial manufacturing  | 12                | 12 (BPSV) or 30 (no BPSV)            | 48                                |
| Scale-up weeks to full capacity | 10                | 16                                   | 16                                |

### 1094 **A.3.1 Timing**

1095 We assume that manufacturers will begin producing at risk once they have confidence in  
1096 vaccine approval. Thus, facility transition (the reorganising of manufacturing facilities in  
1097 preparation for SSV dose production) begins  $I_0 = 7$  weeks before vaccine approval, which in  
1098 turn depends on R&D investments. We have three levels in our scenarios, corresponding to  
1099 SSVs available in 100 days, 200 days, and 365 days. The total weeks taken for vaccine approval  
1100 can be written as follows:

$$W^{(\zeta)} = \sum_{i=0}^3 W_i^{(\zeta)}$$

1101 for  $\zeta \in \{365, 200, 100\}$ . These work out as 52, 28, and 14 weeks, respectively. Thus “week  
1102 0” for manufacturing occurs 45, 21, and 7 weeks, respectively, after the new pathogen has been  
1103 sequenced. We denote this variable  $w_s^{(0)}$ :

$$w_s^{(0)} = W^{(\zeta(s))} - I_0 = \begin{cases} 45 & s \in \{0, 1, 2, 3, 10\} \\ 22 & s \in \{4, 5, 6\} \\ 7 & s \in \{7, 8, 9\} \end{cases}$$

### 1104 **A.3.2 Production**

1105 We estimate total global manufacturing potential to be  $M_G = 15$  billion doses per year, and  
1106 the amount currently in operation to be  $M_C = 9$ . The volume that is reserved, in billion doses,  
1107 including the HIC-specific reservation of  $A_3 = 0.5$  billion doses, depends on the scenarios as  
1108 follows:

$$M_{R,s} = \begin{cases} A_3 & s \in \{0, 1, 4, 7, 10\} \\ A_3 + 0.7 & s \in \{2, 5, 8\} \\ A_3 + 2 & s \in \{3, 6, 9\} \end{cases}$$

1109 where  $s = 0$  denotes the BAU scenario. By definition,  $M_{E,s} = M_C - M_{R,s}$  (existing  
 1110 unreserved capacity (“E”) equals the total currently existing (“C”) minus reserved capacity  
 1111 (“R”)), and  $M_B = M_G - M_C$  (newly built manufacturing (“B”) equals the global total (“G”)  
 1112 minus the existing capacity).

1113 Then the number of doses, in billions, that are made from capacity  $x \in \{R, E, B\}$  in week  
 1114  $w$  of scenario  $s$  is:

$$Z_{x,s,w} = \begin{cases} 0 & w - w_s^{(0)} \leq I_x \\ \frac{1}{52} \frac{w - w_s^{(0)} - I_x}{C_x} M_{x,s} & w - w_s^{(0)} \in (I_x, I_x + C_x] \\ \frac{1}{52} M_{x,s} & w - w_s^{(0)} > I_x + C_x \end{cases}$$

1115 Here,  $I_R = 12$  is the number of weeks to initial manufacturing for reserved capacity, assuming  
 1116 streamlined technology transfer and process set up (around 2 months) and facility process  
 1117 validation (around 1 month).<sup>27</sup>  $C_R = 10$  is its number of weeks to scale up to full capacity,  
 1118 taking the lower end of the mRNA range assumed readiness from reserved capacity in Vaccines  
 1119 Europe.<sup>28</sup>  $I_B = 48$  is the number of weeks to initial manufacturing for newly built capacity.  
 1120 This assumes early planning phase (around 2 months), longer facility improvement to build new  
 1121 infrastructure (around 5 months), tech transfer (around 2 months), and facility/process setup  
 1122 (around 2 months).<sup>27</sup> This also aligns with realistic estimate from manufacturing stakeholder  
 1123 interviews.<sup>29</sup>  $C_B = 16$  is its number of weeks to scale up to full capacity, taking the middle of  
 1124 the range from Vaccines Europe.<sup>28</sup>

$$I_E = \begin{cases} I_{E,1} & s = 1 \\ I_{E,0} & s \neq 1 \end{cases}$$

1125 where  $I_{E,0} = 30$  and  $I_{E,1} = 12$  are the number of weeks to initial manufacturing for existing  
 1126 and unreserved capacity (i.e. manufacturing conversion for SSVs is faster in the presence of

1127 BPSVs as we assume that they are manufactured using the same platform). In the absence of  
 1128 BPSV, we assume early planning phase (around 2 months), streamlined facility improvement  
 1129 because using existing infrastructure (around 1 month), tech transfer (around 2 months), and  
 1130 facility/process set up (around 2 months).<sup>27</sup>  $C_E = 16$  is its number of weeks to scale up to full  
 1131 capacity, assumed to be the same as  $C_B$ . These timelines are shown in Table A.4.

Table A.4: Vaccine Production Timeline when there is no BPSV. When BPSV is also modelled, Existing Private Capacity scales from 0 to 100 in weeks 12–21.

| Weeks from transition start | Reserved Capacity (%) | Existing Private Capacity (%) | Response Private Capacity (%) |
|-----------------------------|-----------------------|-------------------------------|-------------------------------|
| 0–11                        |                       |                               |                               |
| 12–21                       | Scales from 0 to 100  |                               |                               |
| 22–29                       | 100                   |                               |                               |
| 30–45                       | 100                   | Scales from 0 to 100          |                               |
| 46–47                       | 100                   | 100                           |                               |
| 48–63                       | 100                   | 100                           | Scales from 0 to 100          |
| 64+                         | 100                   | 100                           | 100                           |

### 1132 A.3.3 Allocation

1133 Denote the weekly allocated doses at week  $w$  from capacity  $x$  to income level  $i$   $k_{s,x,i,w}$ , and  
 1134 the cumulative number  $K_{s,i,w}$ , such that

$$K_{s,i,w} = \sum_{x \in \{R,E,B\}} \sum_{j=0}^w k_{s,x,i,j}.$$

$$k_{s,R,i,w} = \begin{cases} \left( \frac{A_3}{M_{R,s}} + \frac{M_{R,s} - A_3}{M_{R,s}} \frac{N_{HIC}}{N_T} \right) Z_{R,s,w} & K_{s,HIC,w} < L_{HIC} \text{ \& } i = HIC \\ \frac{M_{R,s} - A_3}{M_{R,s}} \frac{N_i}{N_T} Z_{R,s,w} & K_{s,HIC,w} < L_{HIC} \text{ \& } i \neq HIC \\ 0 & K_{s,HIC,w} \geq L_{HIC} \text{ \& } i = HIC \\ \frac{N_i}{N_{UMIC} + N_{LMIC} + N_{LIC}} Z_{R,s,w} & K_{s,HIC,w} \geq L_{HIC} \text{ \& } K_{s,UMIC,w} < L_{UMIC} \text{ \& } i \neq HIC \\ 0 & K_{s,UMIC,w} \geq L_{UMIC} \text{ \& } i = UMIC \\ \frac{N_i}{N_{LMIC} + N_{LIC}} Z_{R,s,w} & K_{s,UMIC,w} \geq L_{UMIC} \text{ \& } K_{s,LMIC,w} < L_{LMIC} \text{ \& } i \notin \{HIC, UMIC\} \\ 0 & K_{s,LMIC,w} \geq L_{LMIC} \text{ \& } i = LMIC \\ Z_{R,s,w} & K_{s,LMIC,w} \geq L_{LMIC} \text{ \& } K_{s,LIC,w} < L_{LIC} \text{ \& } i = LIC \\ 0 & K_{s,LIC,w} \geq L_{LIC} \end{cases}$$

1135 where  $N_T = \sum_{i \in \{HIC, UMIC, LMIC, LIC\}} N_i$ .

1136 The logic of this reads as follows:

- 1137 •  $A_3 = 0.5$  billion doses per year from reserved capacity go exclusively to HIC, which is
- 1138 expressed as a fraction of the total reservation,  $M_{R,s}$
- 1139 • Any remaining reserved capacity doses are allocated according to population
- 1140 • Once HIC reach their total demand, doses from reserved capacity are split proportional
- 1141 to population between UMIC, LMIC and LIC, and so on

1142 For  $x \in \{E, B\}$ ,

$$k_{s,x,i,w} = \begin{cases} Z_{x,s,w} & K_{s,\text{HIC},w} < L_{\text{HIC}} \ \& \ i = \text{HIC} \\ 0 & K_{s,\text{HIC},w} < L_{\text{HIC}} \ \& \ i \neq \text{HIC} \\ Z_{x,s,w} & K_{s,\text{HIC},w} \geq L_{\text{HIC}} \ \& \ K_{s,\text{UMIC},w} < L_{\text{UMIC}} \ \& \ i = \text{UMIC} \\ 0 & K_{s,\text{HIC},w} \geq L_{\text{HIC}} \ \& \ K_{s,\text{UMIC},w} < L_{\text{UMIC}} \ \& \ i \neq \text{UMIC} \\ Z_{x,s,w} & K_{s,\text{UMIC},w} \geq L_{\text{UMIC}} \ \& \ K_{s,\text{LMIC},w} < L_{\text{LMIC}} \ \& \ i = \text{LMIC} \\ 0 & K_{s,\text{UMIC},w} \geq L_{\text{UMIC}} \ \& \ K_{s,\text{LMIC},w} < L_{\text{LMIC}} \ \& \ i \neq \text{LMIC} \\ Z_{x,s,w} & K_{s,\text{LMIC},w} \geq L_{\text{LMIC}} \ \& \ i = \text{LIC} \\ 0 & K_{s,\text{LMIC},w} \geq L_{\text{LMIC}} \ \& \ i \neq \text{LIC} \end{cases}$$

1143 The logic of this reads as follows:

- 1144 • Until HIC demand is reached, all doses from unreserved capacity go to HIC. None go to
- 1145 UMIC, LMIC or LIC.
- 1146 • Once HIC demand has been met and until UMIC demand is reached, all doses from
- 1147 unreserved capacity go to UMIC. None go to HIC, LMIC or LIC.
- 1148 • Once HIC and UMIC demand have been met and until LMIC demand is reached, all
- 1149 doses from unreserved capacity go to LMIC. None go to HIC, UMIC or LIC.
- 1150 • Once HIC, UMIC and LMIC demand have been met, all remaining doses from unreserved
- 1151 capacity go to LIC. None go to LMIC, UMIC or HIC.

1152 Total supply of first-schedule doses in each year period is

$$A_{x,s,y}^{(1)} = \sum_i \sum_{w \in y} k_{s,x,i,w}.$$

1153 We assume, for every second dose of SSV, a booster will be given one year later for  
 1154  $N^{(\text{boost})} = 2$  years.

1155 Thus

$$A_{s,y}^{(2)} = \begin{cases} \frac{1}{2} \sum_x A_{x,s,y-1}^{(1)} & y = 2 \\ \frac{1}{2} \sum_x \left( A_{x,s,y-1}^{(1)} + A_{x,s,y-2}^{(1)} \right) & y > 2 \end{cases}$$

1156 and

$$A_{x,s,y}^{(2)} = \min(A_{s,y}^{(2)}, M_R - A_{R,s,y}^{(1)})$$

1157 for  $x = R$  and

$$A_{x,s,y}^{(2)} = \max(A_{s,y}^{(2)} - A_{R,s,y}^{(2)}, 0)$$

1158 for  $x \in \{E, B\}$ .

1159 Then

$$A_{x,s,y} = A_{x,s,y}^{(1)} + A_{x,s,y}^{(2)}. \quad (12)$$

### 1160 A.3.4 Delivery

1161 Delivery is written as  $h_{s,i,w}^{(j)}$  doses delivered in scenario  $s$ , income group  $i$  and week  $w$  for  
 1162 schedule  $j$ , which is  $j = 1$  for first-dose SSV,  $j = 2$  for second-dose SSV, and  $j = 2 + k$  for  
 1163  $k = \{1, \dots, N^{(boost)}\}$ .

1164 The second dose is prioritised over the first, and follows the first by four weeks, so

$$h_{s,i,w}^{(2)} = h_{s,i,w-4}^{(1)}.$$

1165 Available doses are  $K_{s,i,w}$ , the cumulative doses allocated to income group  $i$  by week  $w$ ,  
 1166 minus doses given so far. First doses stop being given once  $L_i/2$  is reached.

$$h_{s,i,w}^{(1)} = \max \left( 0, \min \left( K_{s,i,w} - h_{s,i,w}^{(2)} - \sum_{j=1}^2 \sum_{k=1}^{w-1} h_{s,i,k}^{(j)}, L_i/2 - \sum_{k=1}^{w-1} h_{s,i,k}^{(1)} \right) \right)$$

1167 Booster doses are given for  $j = 2 + k$  for  $k = \{1, \dots, N^{(boost)}\}$ :

$$h_{s,i,w}^{(2+k)} = h_{s,i,w-52k}^{(2)}.$$

1168 Total doses are therefore

$$h_{s,i,w} = \sum_{j=1}^{2+N^{(boost)}} h_{s,i,w}^{(j)}.$$

1169 The input to the impact model is  $h_{s,i,w}^{(2)}$ , i.e. doses delivered per week, per scenario, per  
 1170 income level. The weekly value is transformed to a daily value by dividing by 7, i.e. every day  
 1171 in a given week sees the same number of doses distributed. The impact model combines LIC  
 1172 and LMIC into a single category, LLMIC. For this, a population-weighted average is taken of  
 1173  $h_{s,LIC,w}^{(2)}$  and  $h_{s,LMIC,w}^{(2)}$ . The same applies to BPSV delivery.

## 1174 A.4 BPSV delivery

### 1175 A.4.1 Timing

1176 The duration of the Phase 3 trial is  $W_3^{(365)} = 18$  weeks. The time to manufacturing transition  
 1177 is  $I_R = 12$  weeks, and the time to manufacturing scale-up  $C_R = 10$  weeks; these are the same  
 1178 as the reserved-capacity times for SSV.

1179 Facility transition occurs in week 1. Thus manufacturing begins in week  $1 + I_R = 13$  and  
 1180 dose distribution begins in week  $1 + W_3^{(365)} = 19$ .

### 1181 A.4.2 Production

1182 The number of doses, in billions, that are made in week  $w$  is:

$$Z_w = \begin{cases} 0 & w < I_R \\ \frac{1}{52} \frac{w - I_x + 1}{C_x} M_{x,s} & w \in [I_R, I_R + C_R) \\ \frac{1}{52} M_{x,s} & w - 1 \geq I_R + C_x R \end{cases}$$

1183 Doses are all allocated in proportion to eligible populations.

## 1184 A.5 Data for the cost model

1185 Data sources for the costing model are given in Table A.5.

Table A.5: **Notation, parametric assumptions and data sources for inputs to the costing model.** Parameters are used as follows: uniform distributions go from Parameter 1 to Parameter 2. Triangular distributions go from Parameter 1 to Parameter 3 with a peak at Parameter 2. Multinomial distributions have equally probable values listed individually. Exponential distributions have as a mean Parameter 1. Inverse Gaussian distributions have as a mean Parameter 1, and as a shape Parameter 2. Log normal distributions have as a mean Parameter 1, and as a standard deviation Parameter 2. PearsonV distributions have shape Parameter 1, scale Parameter 2, and location 0.

| Math notation       | Description                                 | Distribution | Parameters                                                 | Source                       |
|---------------------|---------------------------------------------|--------------|------------------------------------------------------------|------------------------------|
| <i>BPSV R&amp;D</i> |                                             |              |                                                            |                              |
| $N^{(BPSV)}$        | Total number of BPSV candidates in pipeline | Constant     | 14                                                         | See Section A.1.1            |
| $P_0^{(BPSV)}$      | Probability of success; preclinical         | Multinomial  | 0.40, 0.41, 0.41, 0.42, 0.48, 0.57                         | Gouglas et al. <sup>30</sup> |
| $P_1^{(BPSV)}$      | Probability of success; Phase 1             | Multinomial  | 0.33, 0.40, 0.50, 0.68, 0.70, 0.72, 0.74, 0.77, 0.81, 0.90 | Gouglas et al. <sup>30</sup> |
| $P_2^{(BPSV)}$      | Probability of success; Phase 2             | Multinomial  | 0.22, 0.31, 0.33, 0.43, 0.46, 0.54, 0.58, 0.58, 0.74, 0.79 | Gouglas et al. <sup>30</sup> |
| $P_3^{(BPSV)}$      | Probability of success; Phase 3             | Uniform      | 0.4, 0.8                                                   | Lo et al. <sup>31</sup>      |
| $Y_0^{(B)}$         | Ordinary preclinical duration; years        | Multinomial  | 1, 2                                                       | CEPI <sup>32</sup>           |
| $Y_1^{(B)}$         | Ordinary Phase 1 duration; years            | Multinomial  | 1, 2                                                       | CEPI <sup>32</sup>           |
| $Y_2^{(B)}$         | Ordinary Phase 2 duration; years            | Constant     | 2                                                          | CEPI <sup>32</sup>           |
| $Y_3^{(B)}$         | Ordinary Phase 3 duration; years            | Multinomial  | 3, 4                                                       | CEPI <sup>32</sup>           |
| <i>SSV R&amp;D</i>  |                                             |              |                                                            |                              |
| $Q^{(SSV)}$         | Probability of N or more SSV successes      | Constant     | 0.9                                                        | Model choice                 |
| $n^{(SSV)}$         | Number of SSV successes                     | Constant     | 5                                                          | Model choice                 |
| $X_0$               | COVID-19 candidates failed at preclinical   | Constant     | 33                                                         | Linksbridge SPC <sup>9</sup> |

| Math notation | Description                                     | Distribution | Parameters | Source                       |
|---------------|-------------------------------------------------|--------------|------------|------------------------------|
| $X_1$         | COVID-19 candidates failed at Phase 1           | Constant     | 20         | Linksbridge SPC <sup>9</sup> |
| $X_2$         | COVID-19 candidates failed at Phase 2           | Constant     | 8          | Linksbridge SPC <sup>9</sup> |
| $X_3$         | COVID-19 candidates failed at Phase 3           | Constant     | 8          | Linksbridge SPC <sup>9</sup> |
| $X_4$         | COVID-19 candidates successful                  | Constant     | 27         | Linksbridge SPC <sup>9</sup> |
| $Y^{(200)}$   | Years of R&D to 200-day readiness               | Constant     | 5          | Model choice                 |
| $Y^{(100)}$   | Years of R&D to 100-day readiness               | Constant     | 15         | Model choice                 |
| $E$           | Enabling activities; million USD per year       | Constant     | 700        | CEPI <sup>33</sup>           |
| $W_0^{(365)}$ | Reactive preclinical duration (365); weeks      | Constant     | 14         | CEPI <sup>32</sup>           |
| $W_0^{(200)}$ | Reactive preclinical duration (200 days); weeks | Constant     | 5          | CEPI <sup>32</sup>           |
| $W_0^{(100)}$ | Reactive preclinical duration (100 days); weeks | Constant     | 5          | CEPI <sup>32</sup>           |
| $W_1^{(365)}$ | Reactive Phase 1 duration (365); weeks          | Constant     | 0          | CEPI <sup>32</sup>           |
| $W_1^{(200)}$ | Reactive Phase 1 duration (200 days); weeks     | Constant     | 0          | CEPI <sup>32</sup>           |
| $W_1^{(100)}$ | Reactive Phase 1 duration (100 days); weeks     | Constant     | 0          | CEPI <sup>32</sup>           |
| $W_2^{(365)}$ | Reactive Phase 2 duration (365); weeks          | Constant     | 19         | CEPI <sup>32</sup>           |
| $W_2^{(200)}$ | Reactive Phase 2 duration (200 days); weeks     | Constant     | 7          | CEPI <sup>32</sup>           |
| $W_2^{(100)}$ | Reactive Phase 2 duration (100 days); weeks     | Constant     | 0          | CEPI <sup>32</sup>           |

| Math notation            | Description                                            | Distribution     | Parameters                                       | Source                           |
|--------------------------|--------------------------------------------------------|------------------|--------------------------------------------------|----------------------------------|
| $W_3^{(365)}$            | Reactive Phase 3 duration (365); weeks                 | Constant         | 18                                               | CEPI <sup>32</sup>               |
| $W_3^{(200)}$            | Reactive Phase 3 duration (200 days); weeks            | Constant         | 15                                               | CEPI <sup>32</sup>               |
| $W_3^{(100)}$            | Reactive Phase 3 duration (100 days); weeks            | Constant         | 8                                                | CEPI <sup>32</sup>               |
| <i>R&amp;D costs</i>     |                                                        |                  |                                                  |                                  |
| $T_0^{(e)}$              | R&D cost, preclinical, experienced manufacturer; USD   | Exponential      | Mean: 24,213,683                                 | Gouglas et al. <sup>30</sup>     |
| $T_0^{(n)}$              | R&D cost, preclinical, inexperienced manufacturer; USD | Inverse Gaussian | Mean: 7,882,792, Shape: 13,455,907               | Gouglas et al. <sup>30</sup>     |
| $T_1^{(e)}$              | R&D cost, Phase 1, experienced manufacturer; USD       | Inverse Gaussian | Mean: 15,339,198, Shape: 8,076,755               | Gouglas et al. <sup>30</sup>     |
| $T_1^{(n)}$              | R&D cost, Phase 1, inexperienced manufacturer; USD     | PearsonV         | Shape: 2.2774, Scale: 9,799,081                  | Gouglas et al. <sup>30</sup>     |
| $T_2^{(e)}$              | R&D cost, Phase 2, experienced manufacturer; USD       | Log normal       | Mean: 28,297,339, Standard deviation: 24,061,641 | Gouglas et al. <sup>30</sup>     |
| $T_2^{(n)}$              | R&D cost, Phase 2, inexperienced manufacturer; USD     | Inverse Gaussian | Mean: 17,124,622, Shape: 35,918,793              | Gouglas et al. <sup>30</sup>     |
| $T_3^{(e)}$              | R&D cost, Phase 3, experienced manufacturer; USD       | PearsonV         | Shape: 1.3147, Scale: 51,397,313                 | Gouglas et al. <sup>30</sup>     |
| $T_4$                    | Licensure cost, 2018; USD                              | Constant         | 287750                                           | Gouglas et al. <sup>30</sup>     |
| $\pi$                    | Inflation (2018 to 2025)                               | Constant         | 0.28                                             | U.S. BLS <sup>2</sup>            |
| $\omega$                 | Share of manufacturers that are inexperienced          | Constant         | 0.923076923076923                                | See Table A.1                    |
| $r$                      | Discount rate                                          | Uniform          | 0.02, 0.06                                       | Glennerster et al. <sup>34</sup> |
| <i>Reservation costs</i> |                                                        |                  |                                                  |                                  |

| Math notation            | Description                                                                  | Distribution | Parameters          | Source                                              |
|--------------------------|------------------------------------------------------------------------------|--------------|---------------------|-----------------------------------------------------|
| $A_4$                    | Size of BPSV investigational reserve, doses                                  | Constant     | 100000              | Model choice                                        |
| $A_1$                    | Annual BPSV reservation cost from recurrent cold chain storage, USD per dose | Constant     | 0.00996360623461854 | Griffiths et al. <sup>3</sup>                       |
| $A_5$                    | BPSV reserve upfront cost for cold chain equipment, USD per dose             | Constant     | 0.113154621821165   | Griffiths et al. <sup>3</sup>                       |
| $Y_{rep}$                | Years after which BPSV doses are to be replaced                              | Constant     | 3                   | World Health Organization <sup>5</sup>              |
| $A_2$                    | Advanced capacity reservation fee; USD per dose per year                     | Constant     | 0.531692307692308   | Pfizer <sup>6</sup>                                 |
| $A_3$                    | Reserved capacity for HIC, billions                                          | Constant     | 0.5                 | See Section A.1.3                                   |
| <i>Procurement costs</i> |                                                                              |              |                     |                                                     |
| $S_U$                    | SSV procurement price, reactive capacity; USD per dose                       | Constant     | 18.9392             | Linksbridge SPC <sup>9</sup>                        |
| $G$                      | Drug substance cost; USD per dose                                            | Constant     | 4.68                | Kazaz et al. <sup>35</sup>                          |
| $M_p$                    | Profit margin, fraction                                                      | Constant     | 0.2                 | U.S. Government Accountability Office <sup>10</sup> |
| $M_f$                    | Fill/finish cost, fraction of COGS                                           | Constant     | 0.072               | Kis <sup>4</sup>                                    |
| $M_t$                    | Cost to transport product, fraction of COGS                                  | Constant     | 0.1                 | Gotham et al. <sup>11</sup>                         |
| $M_G$                    | Global annual manufacturing volume; billion doses                            | Constant     | 15                  | Linksbridge SPC <sup>9</sup>                        |
| $M_C$                    | Current annual manufacturing volume; billion doses                           | Constant     | 9                   | Linksbridge SPC <sup>9</sup>                        |

| Math notation                  | Description                                                                                    | Distribution | Parameters | Source                                      |
|--------------------------------|------------------------------------------------------------------------------------------------|--------------|------------|---------------------------------------------|
| $\lambda$                      | Final vaccine coverage, proportion of population                                               | Constant     | 0.8        | Model choice                                |
| $\delta$                       | Fraction of vaccines expected to go to waste                                                   | Constant     | 0.1        | Griffiths et al. <sup>3</sup>               |
| $N^{(\text{boost})}$           | Number of boosters given, one per year                                                         | Constant     | 2          | Model choice                                |
| <i>Manufacturing timelines</i> |                                                                                                |              |            |                                             |
| $I_0$                          | Facility transition start; weeks before vaccine approval                                       | Constant     | 7          | Model choice                                |
| $I_R$                          | Weeks to initial manufacturing for reserved infrastructure                                     | Constant     | 12         | Kis et al. <sup>27</sup>                    |
| $I_{E,0}$                      | Weeks to initial manufacturing when there's no BPSV for existing and unreserved infrastructure | Constant     | 30         | Kis et al. <sup>27</sup>                    |
| $I_{E,1}$                      | Weeks to initial manufacturing when there's BPSV for existing and unreserved infrastructure    | Constant     | 12         | Kis et al. <sup>27</sup>                    |
| $I_B$                          | Weeks to initial manufacturing for newly built infrastructure                                  | Constant     | 48         | Kis et al., Feddema et al. <sup>27,29</sup> |
| $C_R$                          | Weeks to scale up to full capacity for reserved infrastructure                                 | Constant     | 10         | Vaccines Europe <sup>28</sup>               |
| $C_E$                          | Weeks to scale up to full capacity for unreserved existing infrastructure                      | Constant     | 16         | Vaccines Europe <sup>28</sup>               |
| $C_B$                          | Weeks to scale up to full capacity for newly built infrastructure                              | Constant     | 16         | Vaccines Europe <sup>28</sup>               |
| <i>Delivery costs</i>          |                                                                                                |              |            |                                             |

| Math notation | Description                                                            | Distribution | Parameters   | Source        |
|---------------|------------------------------------------------------------------------|--------------|--------------|---------------|
| $V_{L;0}$     | Cost of vaccine delivery at start up (0–10%) in LIC; USD per dose      | Triangular   | 1, 1.5, 2    | See Table A.2 |
| $V_{L;11}$    | Cost of vaccine delivery during ramp up (11–30%) in LIC; USD per dose  | Triangular   | 0.75, 1, 1.5 | See Table A.2 |
| $V_{L;31}$    | Cost of vaccine delivery at scale (31% and over) in LIC; USD per dose  | Triangular   | 1, 2, 4      | See Table A.2 |
| $V_{LM;0}$    | Cost of vaccine delivery at start up (0–10%) in LMIC; USD per dose     | Triangular   | 3, 4.5, 6    | See Table A.2 |
| $V_{LM;11}$   | Cost of vaccine delivery during ramp up (11–30%) in LMIC; USD per dose | Triangular   | 2.25, 3, 4.5 | See Table A.2 |
| $V_{LM;31}$   | Cost of vaccine delivery at scale (31% and over) in LMIC; USD per dose | Triangular   | 1.5, 2, 2.5  | See Table A.2 |
| $V_{UM;0}$    | Cost of vaccine delivery at start up (0–10%) in UMIC; USD per dose     | Triangular   | 6, 9, 12     | See Table A.2 |
| $V_{UM;11}$   | Cost of vaccine delivery during ramp up (11–30%) in UMIC; USD per dose | Triangular   | 4.5, 6, 9    | See Table A.2 |
| $V_{UM;31}$   | Cost of vaccine delivery at scale (31% and over) in UMIC; USD per dose | Triangular   | 3, 4, 5      | See Table A.2 |
| $V_{H;0}$     | Cost of vaccine delivery at start up (0–10%) in HIC; USD per dose      | Triangular   | 30, 40, 75   | See Table A.2 |

| Math notation           | Description                                                           | Distribution | Parameters | Source           |
|-------------------------|-----------------------------------------------------------------------|--------------|------------|------------------|
| $V_{H;11}$              | Cost of vaccine delivery during ramp up (11–30%) in HIC; USD per dose | Triangular   | 30, 40, 75 | See Table A.2    |
| $V_{H;31}$              | Cost of vaccine delivery at scale (31% and over) in HIC; USD per dose | Triangular   | 30, 40, 75 | See Table A.2    |
| <i>Population sizes</i> |                                                                       |              |            |                  |
| $N_{HIC}^{(0)}$         | Population, HIC (2025)                                                | Constant     | 1267864200 | UN <sup>36</sup> |
| $N_{UMIC}^{(0)}$        | Population, UMIC (2025)                                               | Constant     | 2820990900 | UN <sup>36</sup> |
| $N_{LMIC}^{(0)}$        | Population, LMIC (2025)                                               | Constant     | 3335966100 | UN <sup>36</sup> |
| $N_{LIC}^{(0)}$         | Population, LIC (2025)                                                | Constant     | 777211800  | UN <sup>36</sup> |
| $N_{HIC}^{(15)}$        | Population aged 15 and older, HIC (2025)                              | Constant     | 1073972000 | UN <sup>36</sup> |
| $N_{UMIC}^{(15)}$       | Population aged 15 and older, UMIC (2025)                             | Constant     | 2291421800 | UN <sup>36</sup> |
| $N_{LMIC}^{(15)}$       | Population aged 15 and older, LMIC (2025)                             | Constant     | 2376159400 | UN <sup>36</sup> |
| $N_{LIC}^{(15)}$        | Population aged 15 and older, LIC (2025)                              | Constant     | 459486400  | UN <sup>36</sup> |
| $N_{HIC}^{(65)}$        | Population aged 65 and older, HIC (2025)                              | Constant     | 257098750  | UN <sup>36</sup> |
| $N_{UMIC}^{(65)}$       | Population aged 65 and older, UMIC (2025)                             | Constant     | 358101650  | UN <sup>36</sup> |
| $N_{LMIC}^{(65)}$       | Population aged 65 and older, LMIC (2025)                             | Constant     | 212911560  | UN <sup>36</sup> |
| $N_{LIC}^{(65)}$        | Population aged 65 and older, LIC (2025)                              | Constant     | 25764820   | UN <sup>36</sup> |

# B Supplementary methods B: modelling impacts of advance vaccine investments

## B.1 Framing

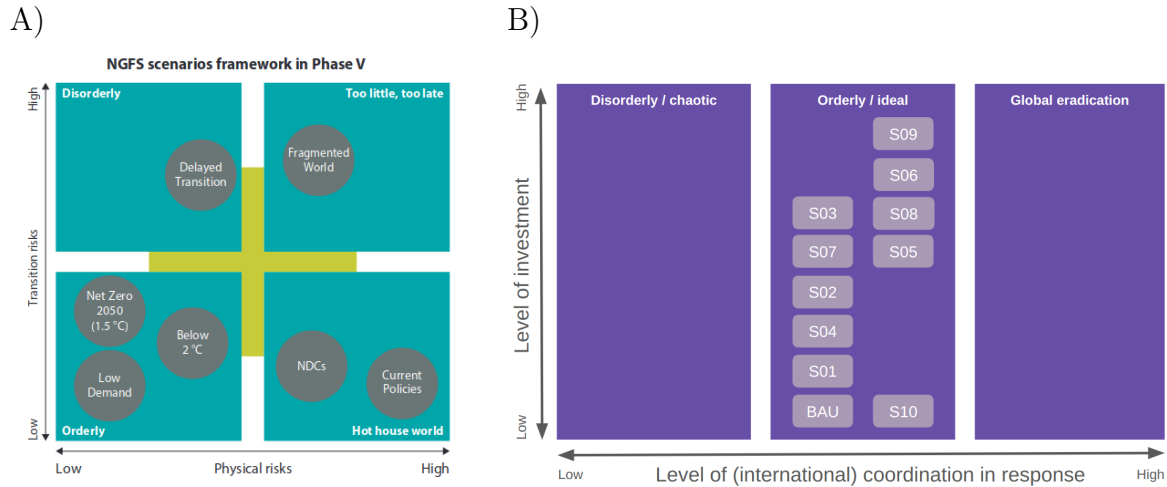

Figure B.1: **Framing scenarios by imagining futures; borrowing from the Network for Greening the Financial System (NGFS).** We borrow from NGFS to illustrate scenarios for estimating the impacts of investments. A) NGFS partition possible futures into four quadrants, with scenarios in each reflecting different levels of physical risks and transition risks.<sup>37d</sup> B) In this work, we only consider “orderly” future response when we model impacts. We do not consider disorderly responses, which would likely have much higher losses and therefore investments would have a greater impact. We don’t consider efforts towards global eradication, which would require global modelling. Here, the losses would be much lower, but we note that investments could facilitate the transition from “orderly” to “global eradication”.

## B.2 Aggregating epidemics to pandemics

We start with the “epidemic library”: 2,048 pathogen samples each simulated in three synthetic country types under eleven different scenarios, from which epidemic losses averted are calculated as differences between a scenario and the BAU. We use the BAU scenario of this library to estimate the correlation between outcomes (specifically, the total societal cost as a percentage of GDP). Using this correlation, we resample outcomes, combining them to give a global loss and a global death burden.

A synthetic country–epidemic sample  $i$  in scenario  $s$  has total societal loss

<sup>d</sup>Permission received to reproduce the figure 4/8/2025.

$$\text{TSL}_{i,s} = K_{1,i,s}\text{VLY}_i + K_{2,i,s} + K_{3,i,s}\text{VSY}_i, \quad (13)$$

1197 where  $K_{1,i,s}$  is the number of life years lost and  $\text{VLY}_i$  the value of a life year;  $K_{2,i,s}$  is the  
 1198 lost GDP over the period due to reduced economic activity; and  $K_{3,i,s}$  is the number of school  
 1199 years lost and  $\text{VSY}_i$  the value of one school year. Then the difference in losses for scenario  $s$  is  
 1200 approximated as

$$\text{V}_{i,s} = \text{TSL}_{i,0} - \text{TSL}_{i,s}, \quad (14)$$

1201 where  $s = 0$  is BAU.

1202 We convert each difference  $\text{V}_{i,s}$  from its value in dollars to its equivalent valuation in lives:

$$\tilde{\text{V}}_{i,s} = \text{V}_{i,s}/\text{VSL}_i. \quad (15)$$

1203 For each scenario, we resample simulated values of  $\tilde{\text{V}}_{i,s}$  to make 2,048 sets of 200 (approx-  
 1204 imating the world's total) synthetic LLMIC, UMIC and HIC with proportions  $\{0.52, 0.32,$   
 1205  $0.16\}$ , reflecting global population distributions. We reorder each set of 2,048 samples such  
 1206 that the rank correlation between the 200 samples matches the median rank correlation for  
 1207 losses observed between synthetic countries. The median correlation between countries' losses  
 1208 within scenarios is 0.62.

1209 Imagine a grid  $\hat{\text{V}}$  of difference values  $\hat{\text{V}}_{j,k}$ , where  $j = 1, \dots, 2,048$  indexes the set of values  
 1210 for  $k = 1, \dots, 200$  countries. For  $k = 1, \dots, 104$ , the sample  $\hat{\text{V}}_{j,k}$  is drawn from the set of values  
 1211  $\tilde{\text{V}}_{i,s}$  belonging to synthetic LLMIC. For  $k = 105, \dots, 168$  values are drawn from synthetic UMIC.  
 1212 For  $k = 169, \dots, 200$  values are drawn from synthetic HIC. Subsequent sets  $\hat{\text{V}}_{j,k'}$  are drawn and  
 1213 ordered so that the rank correlation with  $\hat{\text{V}}_{j,k}$  is 0.62, for all sets  $\{k,k'\}$ .

1214 Our final global samples are sums across rows:  $\bar{\text{V}}_j = \sum_k \hat{\text{V}}_{j,k}$ .<sup>e</sup> Then to convert back to  
 1215 a dollar value, we multiply by the global VSL (for which we take the population-weighted  
 1216 average across all synthetic countries) to give a value in USD, or a % of global GDP.

---

<sup>e</sup>As the columns have been ordered, the top rows would have the most severe pandemics, where most or all countries would have high losses. The bottom rows would have the least severe pandemics, where many countries contribute losses that are nil or small. Because of the heavy-tailed nature of the loss distributions, pandemics of moderate severity would also contain many country contributions that are negligible or small.

1217           We add up the total loss in terms of lives. This approach aligns with that taken in climate  
1218 economics<sup>38,39</sup> as well as cost–benefit analyses in regional<sup>40</sup> and domestic settings.<sup>41,42</sup> It also  
1219 has a foundation in philosophy<sup>43</sup> and international law.<sup>44</sup> Finally, it is consistent with analyses  
1220 that choose not to apply valuations to lives and life years at all and therefore treat them on  
1221 an equal basis. We measure in lives and not money, because it is human life that we value.  
1222 We report results in monetary terms as it is more familiar as a metric for valuing but we note  
1223 that money is itself of value only inasmuch as it proxies welfare.

### B.3 Exceedance probabilities

To approximate the  $\Delta$ LIR of investments into vaccines and vaccination capacity, we estimate the likelihood of pandemics of different severities occurring, using a generalised Pareto distribution (GPD). It has been assumed previously that these can describe the empirical exceedance frequency distribution of epidemic intensity adequately, where intensity was defined as deaths per thousand population per year.<sup>45</sup>

As we are interested in the total burden, we apply the same methodology to “severity”, which we define as deaths per thousand population. We note that, although “severity” will likely have a different distribution from “intensity”, it appears the GPD model fit is not substantially worse for the dataset of Marani et al.<sup>45</sup> from 1600 up to the present day (Figure B.2).

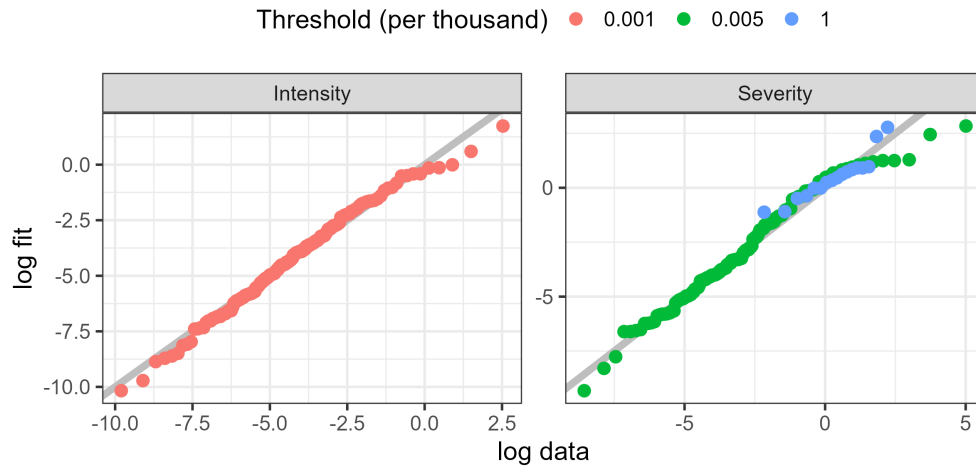

Figure B.2: **QQ plot for GPD fits** Quantile–quantile plot showing the generalised Pareto distributions’ fit to the intensity (deaths per thousand population per year, left) and severity (deaths per thousand population, right) using the pandemic dataset of Marani et al.<sup>45</sup> up to the year 2020. The Intensity model from Marani et al.<sup>45</sup> assumed a threshold of 0.001. We assume the threshold to be a random variable that varies between  $10^{-1.35}$  and  $10^{-0.75}$ .

Our exceedance probability function is defined by four parameters: the location  $\mu$ , the detection threshold  $p_b$ , and the GPD parameters  $\xi$  and  $\sigma$ . We create model uncertainty for this function by (a) sampling parameter values, and (b) resampling the Marani et al.<sup>45</sup> dataset so that the composition is different for each sample. We sample the threshold  $\mu$  that defines where the tail begins, which we express as a power of ten with exponent varying uniformly between -1.35 and -0.75. We treat the threshold as a random variable to reflect modelling uncertainty about where the GPD tail should begin. The other three parameters are

1241 estimated for each bootstrapped dataset as in Marani et al.<sup>45f</sup>:  $p_b$  is defined as the fraction of  
1242 epidemics with deaths per thousand greater than  $\mu$  in the resampled dataset, and  $\xi$  and  $\sigma$   
1243 are estimated through fitting the function to the data given the sampled value of  $\mu$  using the  
1244 maximum likelihood method in the R package `evir`. Maximum likelihood is consistent with  
1245 the methodology of Marani et al.<sup>45</sup> and performs well with small samples, as we have as  $\mu$   
1246 approaches 1. We account for sensitivity to the few extreme values through bootstrapping.

1247 The bulk of the distribution is fit using a lognormal distribution, which is used to give  
1248 probabilities to values to the left of the tail. We have one more parameter to complete this  
1249 part of the model:  $p_S$ , which is the probability for the epidemic-causing pathogen to be a  
1250 sarbecovirus. This value comes from application of a logistic function to the subset of resampled  
1251 data from the last one hundred years (excluding the last instance of pneumonia, which might  
1252 have been SARS). Sampled values for this parameter have a mean of 0.22 and an IQR of  
1253 0.11–0.29. Using this distribution, the probability (IQR) that at least one SARS-X pandemic  
1254 triggers a pandemic response (i.e. it has the severity of a once-in-thirty-years pandemic or  
1255 greater) in a seventy-five-year period is 40–44%. The expected number of such events over the  
1256 period has IQR 0.52–0.57.

1257 The global samples approximating pandemics from Section B.2 have an associated number  
1258 of deaths. We use the global death burden in the BAU scenario to be the “counterfactual”  
1259 pandemic death burden. We map this number onto the GPD to get an exceedance probability  
1260 for each sample (illustrated in Figure C.8). As each scenario uses the same set of epidemics  
1261 in the same order, the scenario has the same probability as its counterfactual counterpart,  
1262 and we can build the distribution of  $\Delta\text{LIR}$  as the differences between scenarios and their  
1263 counterfactuals.

1264 We also use the exceedance probability of the counterfactual to build distributions of  $\Delta\text{LIR}$   
1265 for events corresponding to a particular return time, for the cases that the pandemics are  
1266 caused by SARS-X, where return time is the average time expected to pass between events  
1267 that exceed a specified threshold of severity. That is, we imagine there has been a pandemic  
1268 that was caused by SARS-X and has a severity that we would expect to see only once per  
1269 return time. These illustrations therefore do not include uncertainty from the random variable

---

<sup>f</sup>Note that we use all the data collated by Marani et al.<sup>45</sup> up to now, and add the COVID-19 pandemic.<sup>46</sup> Additionally, we find 1.8 thousand rather than 1.8 million deaths reported in Hashemi Shahraki et al.<sup>47</sup>



## B.4 Data for the impact model

Table B.6: **Data sources used in the impact model.** Some sources were accessed directly from the source that produced them; others are from publications that collated data and made them available, which we subsequently accessed.

| Item                                 | Source                        | Date accessed  | Number of countries in source |      |      |     |
|--------------------------------------|-------------------------------|----------------|-------------------------------|------|------|-----|
|                                      |                               |                | HIC                           | UMIC | LMIC | LIC |
| <i>Demographic</i>                   |                               |                |                               |      |      |     |
| Population distribution by age       | Walker et al. <sup>48</sup>   | June 2024      | 64                            | 51   | 55   | 27  |
| Life expectancy                      | Doohan et al. <sup>49</sup>   | May 2023       | 51                            | 50   | 54   | 25  |
| <i>Economic</i>                      |                               |                |                               |      |      |     |
| GDP                                  | Piburn <sup>50</sup>          | April 2024     | 67                            | 53   | 54   | 24  |
| Number of workers per sector         | Doohan et al. <sup>49</sup>   | May 2023       | 44                            | 36   | 42   | 19  |
| GVA per sector                       | Doohan et al. <sup>49</sup>   | May 2023       | 42                            | 15   | 10   | 2   |
| Labour share of GVA                  | Feenstra et al. <sup>51</sup> | April 2024     | 52                            | 35   | 29   | 9   |
| Fraction working from home by sector | Doohan et al. <sup>49</sup>   | May 2023       | 44                            | 36   | 42   | 19  |
| Tourism statistics                   | UN Tourism <sup>52</sup>      | April 2024     | 28                            | 5    | 2    | 0   |
| COVID-19 tourism impact              | UN Tourism <sup>53</sup>      | April 2024     | 42                            | 14   | 8    | 0   |
| Pupil–teacher ratio                  | Piburn <sup>50</sup>          | September 2025 | 68                            | 49   | 53   | 27  |
| Economic configurations              | Doohan et al. <sup>49</sup>   | May 2023       | 2                             | 1    | 0    | 0   |
| <i>Epidemiological</i>               |                               |                |                               |      |      |     |
| Community contact matrix             | Walker et al. <sup>48</sup>   | October 2023   | 10                            | 2    | 2    | 0   |
| Workplace-related contacts           | Jarvis et al. <sup>54</sup>   | January 2024   | 4                             | 0    | 0    | 0   |
| Hospital capacity                    | Doohan et al. <sup>49</sup>   | May 2023       | 57                            | 50   | 55   | 26  |
| Testing rate                         | Doohan et al. <sup>49</sup>   | May 2023       | 55                            | 46   | 44   | 25  |
| Mobility                             | Doohan et al. <sup>49</sup>   | May 2023       | 52                            | 31   | 33   | 10  |
| COVID-19 deaths                      | Doohan et al. <sup>49</sup>   | May 2023       | 52                            | 31   | 33   | 10  |
| Policy response                      | Doohan et al. <sup>49</sup>   | May 2023       | 52                            | 31   | 33   | 10  |
| Pathogen natural history parameters  | Doohan et al. <sup>49</sup>   | May 2023       |                               |      | NA   |     |
| Historic outbreaks                   | Marani et al. <sup>45</sup>   | November 2023  |                               |      | NA   |     |

1272

## C Supplementary results

1273

### C.1 Results for costs of preparedness and response investments

1274

#### C.1.1 Preparedness costs

1275

Preparedness costs are given in Table C.10. Capacity reservation costs are incurred annually.

1276

BPSV manufacturing begins after R&D completion and vaccine licensure and doses are stored

1277

in an investigational reserve. One third of the vaccine reserve is manufactured each year to

1278

replace expiring doses. For enabling activities, we assume that CEPI's 2.0 budget is required

1279

for accelerating vaccine development timelines. We assume that five years of investment are

1280

needed to achieve 200 days to SSV, and 15 years of investment are needed to achieve 100 days

1281

to SSV, costing \$700M annually for the duration of investment.<sup>33</sup>

1282

#### C.1.2 Cumulative preparedness costs over time

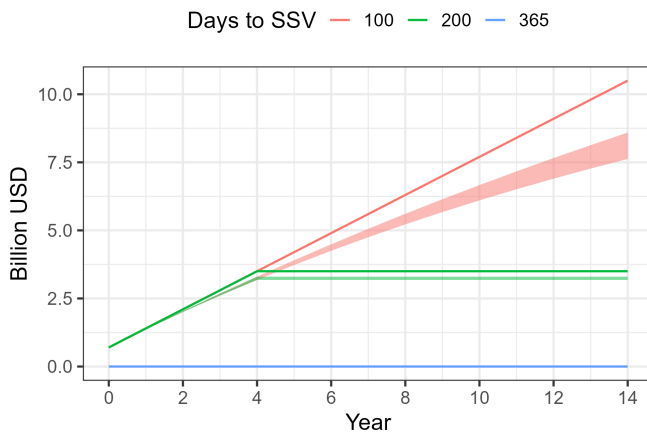

Figure C.3: Cumulative costs for R&D investments into SSV preparedness as they accumulate over a fifteen-year time horizon for three levels of investment considered: none, which would lead to 365 to SSV; five years of investments, which would lead to 200 days to SSV; and fifteen years, which would lead to 100 days to SSV. Lines show costs without discounting, and shaded areas IQRs with uncertain discount rates.

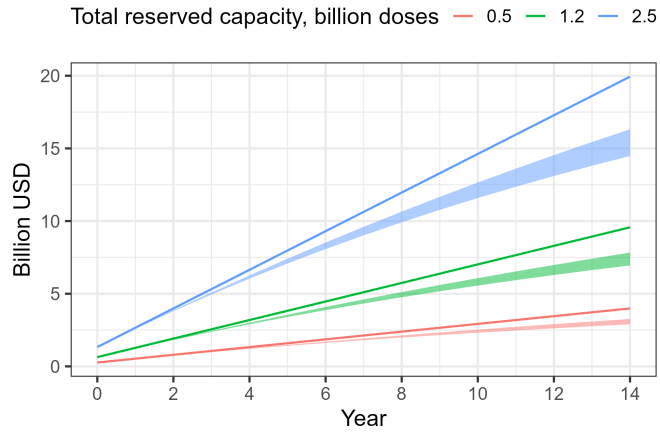

Figure C.4: Cumulative costs for capacity reservations as they accumulate over a fifteen-year time horizon for three levels of investment considered: no additional reservations beyond the 0.5bn-dose existing agreement; 0.7bn additional reserved doses; and 2bn additional doses. Lines show costs without discounting, and shaded areas IQRs with uncertain discount rates.

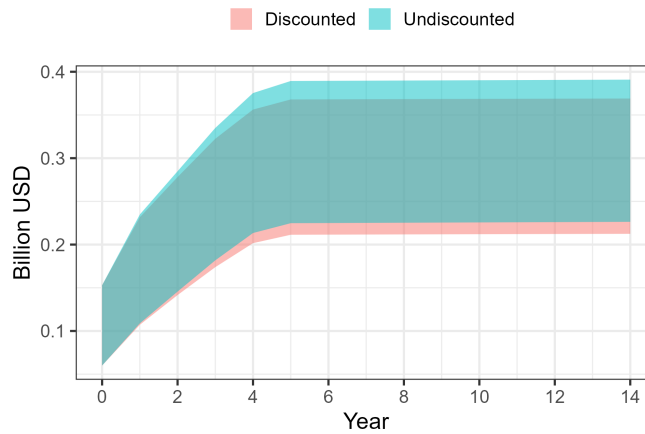

Figure C.5: Cumulative costs for BPSV investment as they accumulate over a fifteen-year time horizon (interquartile range). Red shows costs without discounting, and blue areas with uncertain discount rates.

### C.1.3 Vaccine delivery

Table C.7: **Excess doses held by HIC.** The maximum number of SSV doses held idle (i.e. in excess of what they can deliver) by HIC while other countries have no doses during outbreak response.

| Scenario | Doses<br>(millions) |
|----------|---------------------|
| BAU      | 560                 |
| S01      | 641                 |
| S02      | 0                   |
| S03      | 0                   |
| S04      | 560                 |
| S05      | 0                   |
| S06      | 0                   |
| S07      | 560                 |
| S08      | 0                   |
| S09      | 0                   |
| S10      | 0                   |

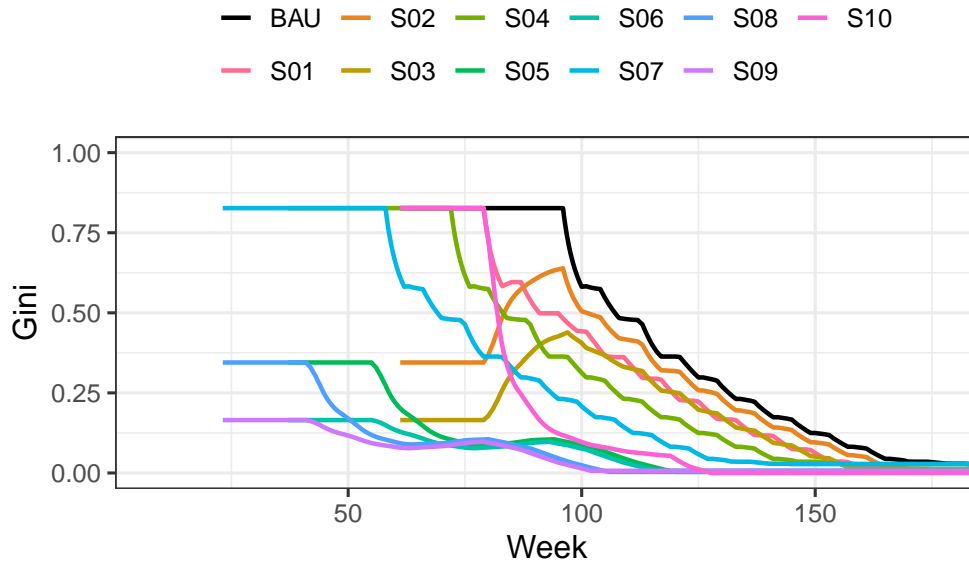

Figure C.6: **Inequality in vaccine delivery across income levels.** Shown for each scenario is the evolution of the Gini coefficient over time for SSV second doses delivered. There are three starting points corresponding to the three reservation sizes: where only HIC have capacity reserved (BAU, S01, S04, S07, S10), 17% of the world's population aged 15 and older get all the doses. The coefficient here is 0.83, close to the 0.88 reported by Tatar et al.<sup>55</sup> Where there is reserved capacity of 700 million doses per year also for UMIC and LLMIC (S02, S05, S08) the starting coefficient is lower, and for two billion doses (S03, S06, S09) it is lower still. Coefficients tend towards zero, at which point all income levels have 80% coverage in the target population. In scenarios in which there are additional reservations and unreserved doses go preferentially to HIC (S02, S03), there is an increase in the coefficient when those unreserved doses are produced and delivered in HIC. All scenarios whose unreserved doses go preferentially to HIC (BAU, S01, S02, S03, S04, S07) display delivery bottlenecks (which manifest as kinks in trajectories, also visible in Figure 1), wherein the countries receiving doses reach their delivery capacity and therefore have excess doses lying idle.

Table C.8: **Time to 40% vaccination coverage, by scenario and country income group, in weeks.** The timeline starts on the day the pathogen is sequenced.

| Scenario | HIC | UMIC | LMIC | LIC |
|----------|-----|------|------|-----|
| BAU      | 89  | 106  | 141  | 149 |
| S01      | 73  | 90   | 130  | 139 |
| S02      | 88  | 106  | 135  | 142 |
| S03      | 88  | 103  | 128  | 132 |
| S04      | 65  | 82   | 117  | 125 |
| S05      | 77  | 85   | 89   | 86  |
| S06      | 74  | 83   | 85   | 84  |
| S07      | 51  | 68   | 103  | 111 |
| S08      | 63  | 71   | 75   | 72  |
| S09      | 60  | 69   | 71   | 70  |
| S10      | 102 | 110  | 110  | 110 |

Table C.9: **Cost differences: investments vs. BAU, for different types of investment.** Values, corresponding to Figure 2, are shown to two significant figures, with interquartile ranges (IQR) in parenthesis. Response (Per pandemic) costs are discounted to the first year in which they occur (the start of the pandemic). Upfront and annual costs (Per year) are presented without discounting.

| When cost is incurred | Type of cost                | Investment           | Cost vs. BAU, billion USD; median (IQR) |
|-----------------------|-----------------------------|----------------------|-----------------------------------------|
| Upfront               | Reservation and procurement | BPSV                 | 0.000011                                |
| Upfront               | R&D                         | BPSV                 | 0.29 (0.22, 0.39)                       |
| Upfront               | R&D                         | 200 days to SSV      | 3.5                                     |
| Upfront               | R&D                         | 100 days to SSV      | 10                                      |
| Per year              | Reservation and procurement | BPSV                 | 0.17                                    |
| Per year              | Reservation and procurement | 0.7 billion capacity | 0.37                                    |
| Per year              | Reservation and procurement | 2 billion capacity   | 1.1                                     |
| Per pandemic          | R&D                         | BPSV                 | 0.007 (0.0039, 0.015)                   |
| Per pandemic          | R&D                         | 200 days to SSV      | -0.15 (-0.25, -0.093)                   |
| Per pandemic          | R&D                         | 100 days to SSV      | -0.23 (-0.36, -0.15)                    |
| Per pandemic          | Reservation and procurement | BPSV                 | 4.7                                     |
| Per pandemic          | Reservation and procurement | 0.7 billion capacity | -34                                     |
| Per pandemic          | Reservation and procurement | 2 billion capacity   | -110                                    |
| Per pandemic          | Delivery                    | BPSV                 | 14 (12, 16)                             |
| Per pandemic          | Delivery                    | 0.7 billion capacity | 0.15 (0.11, 0.18)                       |
| Per pandemic          | Delivery                    | 2 billion capacity   | 0.35 (0.27, 0.43)                       |
| Per pandemic          | Delivery                    | Equality + Delivery  | -1.8 (-2.3, -1.4)                       |

### C.1.4 Full results for preparedness and response costs

Table C.10: **Preparedness and response costs.** Singular values are shown for values that don't include uncertainty. Interquartile ranges of 10,000 samples are shown for uncertain costs. All values are million USD in 2025 prices, with response costs given once discounted to the first year of response, once without discounting, and once as a percentage of total response costs. Upfront costs are discounted to the present day.

|                                                 | BAU     | S01           | S02     | S03     | S04         | S05         | S06         | S07         | S08         | S09         | S10     |
|-------------------------------------------------|---------|---------------|---------|---------|-------------|-------------|-------------|-------------|-------------|-------------|---------|
| <i>Upfront costs; million USD</i>               |         |               |         |         |             |             |             |             |             |             |         |
| BPSV upfront R&D                                | 0       | 210–370       | 0       | 0       | 0           | 0           | 0           | 0           | 0           | 0           | 0       |
| BPSV upfront procurement                        | 0       | 0.01          | 0       | 0       | 0           | 0           | 0           | 0           | 0           | 0           | 0       |
| Enabling activities                             | 0       | 0             | 0       | 0       | 3,200–3,300 | 3,200–3,300 | 3,200–3,300 | 7,600–8,600 | 7,600–8,600 | 7,600–8,600 | 0       |
| Total upfront                                   | 0       | 210–370       | 0       | 0       | 3,200–3,300 | 3,200–3,300 | 3,200–3,300 | 7,600–8,600 | 7,600–8,600 | 7,600–8,600 | 0       |
| <i>Annual costs; million USD;</i>               |         |               |         |         |             |             |             |             |             |             |         |
| Reserved capacity cost                          | 270     | 270           | 640     | 1,300   | 270         | 640         | 1,300       | 270         | 640         | 1,300       | 270     |
| BPSV investigational reserve                    | 0       | 0.17          | 0       | 0       | 0           | 0           | 0           | 0           | 0           | 0           | 0       |
| Total annual                                    | 270     | 270           | 640     | 1,300   | 270         | 640         | 1,300       | 270         | 640         | 1,300       | 270     |
| <i>Response costs (million USD; discounted)</i> |         |               |         |         |             |             |             |             |             |             |         |
| BPSV response R&D                               | 0       | 3.9–15        | 0       | 0       | 0           | 0           | 0           | 0           | 0           | 0           | 0       |
| BPSV response procurement                       | 0       | 4,700         | 0       | 0       | 0           | 0           | 0           | 0           | 0           | 0           | 0       |
| BPSV delivery                                   | 0       | 12,000–16,000 | 0       | 0       | 0           | 0           | 0           | 0           | 0           | 0           | 0       |
| SSV R&D                                         | 200–520 | 200–520       | 200–520 | 200–520 | 100–260     | 100–260     | 100–260     | 52–170      | 52–170      | 52–170      | 200–520 |

|                                                   | BAU      | S01      | S02      | S03      | S04      | S05      | S06      | S07      | S08      | S09      | S10      |
|---------------------------------------------------|----------|----------|----------|----------|----------|----------|----------|----------|----------|----------|----------|
| SSV                                               | 370,000– | 370,000– | 340,000– | 270,000– | 380,000– | 350,000– | 290,000– | 380,000– | 340,000– | 290,000– | 360,000– |
| procurement                                       | 380,000  | 390,000  | 350,000  | 280,000  | 390,000  | 360,000  | 300,000  | 400,000  | 350,000  | 300,000  | 370,000  |
| SSV delivery                                      | 180,000– | 180,000– | 180,000– | 180,000– | 180,000– | 180,000– | 180,000– | 180,000– | 180,000– | 180,000– | 170,000– |
|                                                   | 230,000  | 230,000  | 230,000  | 230,000  | 230,000  | 230,000  | 230,000  | 240,000  | 240,000  | 240,000  | 230,000  |
| Total response                                    | 550,000– | 580,000– | 520,000– | 450,000– | 560,000– | 530,000– | 480,000– | 570,000– | 530,000– | 470,000– | 540,000– |
|                                                   | 610,000  | 640,000  | 580,000  | 510,000  | 620,000  | 590,000  | 530,000  | 630,000  | 590,000  | 530,000  | 600,000  |
| <i>Response costs (million USD; undiscounted)</i> |          |          |          |          |          |          |          |          |          |          |          |
| BPSV                                              | 0        | 3.9–15   | 0        | 0        | 0        | 0        | 0        | 0        | 0        | 0        | 0        |
| response R&D                                      |          |          |          |          |          |          |          |          |          |          |          |
| BPSV                                              | 0        | 4,700    | 0        | 0        | 0        | 0        | 0        | 0        | 0        | 0        | 0        |
| response                                          |          |          |          |          |          |          |          |          |          |          |          |
| procurement                                       |          |          |          |          |          |          |          |          |          |          |          |
| BPSV delivery                                     | 0        | 12,000–  | 0        | 0        | 0        | 0        | 0        | 0        | 0        | 0        | 0        |
|                                                   |          | 16,000   |          |          |          |          |          |          |          |          |          |
| SSV R&D                                           | 200–520  | 200–520  | 200–520  | 200–520  | 100–260  | 100–260  | 100–260  | 52–170   | 52–170   | 52–170   | 200–520  |
| SSV                                               | 410,000  | 410,000  | 380,000  | 300,000  | 410,000  | 380,000  | 320,000  | 410,000  | 370,000  | 310,000  | 400,000  |
| procurement                                       |          |          |          |          |          |          |          |          |          |          |          |
| SSV delivery                                      | 190,000– | 190,000– | 190,000– | 190,000– | 190,000– | 190,000– | 190,000– | 190,000– | 190,000– | 190,000– | 190,000– |
|                                                   | 250,000  | 250,000  | 250,000  | 250,000  | 250,000  | 250,000  | 250,000  | 250,000  | 250,000  | 250,000  | 250,000  |
| Total response                                    | 600,000– | 620,000– | 570,000– | 490,000– | 600,000– | 570,000– | 510,000– | 600,000– | 560,000– | 500,000– | 590,000– |
|                                                   | 660,000  | 690,000  | 630,000  | 550,000  | 660,000  | 630,000  | 570,000  | 660,000  | 620,000  | 560,000  | 650,000  |
| <i>Response costs (% of total response)</i>       |          |          |          |          |          |          |          |          |          |          |          |
| BPSV                                              | 0        | <1       | 0        | 0        | 0        | 0        | 0        | 0        | 0        | 0        | 0        |
| response R&D                                      |          |          |          |          |          |          |          |          |          |          |          |
| BPSV                                              | 0        | <1       | 0        | 0        | 0        | 0        | 0        | 0        | 0        | 0        | 0        |
| response                                          |          |          |          |          |          |          |          |          |          |          |          |
| procurement                                       |          |          |          |          |          |          |          |          |          |          |          |
| BPSV delivery                                     | 0        | 2–2.4    | 0        | 0        | 0        | 0        | 0        | 0        | 0        | 0        | 0        |
| SSV R&D                                           | <1       | <1       | <1       | <1       | <1       | <1       | <1       | <1       | <1       | <1       | <1       |
| SSV delivery                                      | 31–38    | 31–36    | 33–40    | 39–45    | 31–38    | 34–40    | 37–44    | 31–38    | 34–40    | 38–45    | 32–38    |
| SSV                                               | 62–68    | 61–67    | 60–67    | 55–61    | 62–68    | 60–66    | 56–63    | 62–69    | 60–66    | 55–62    | 62–68    |
| procurement                                       |          |          |          |          |          |          |          |          |          |          |          |

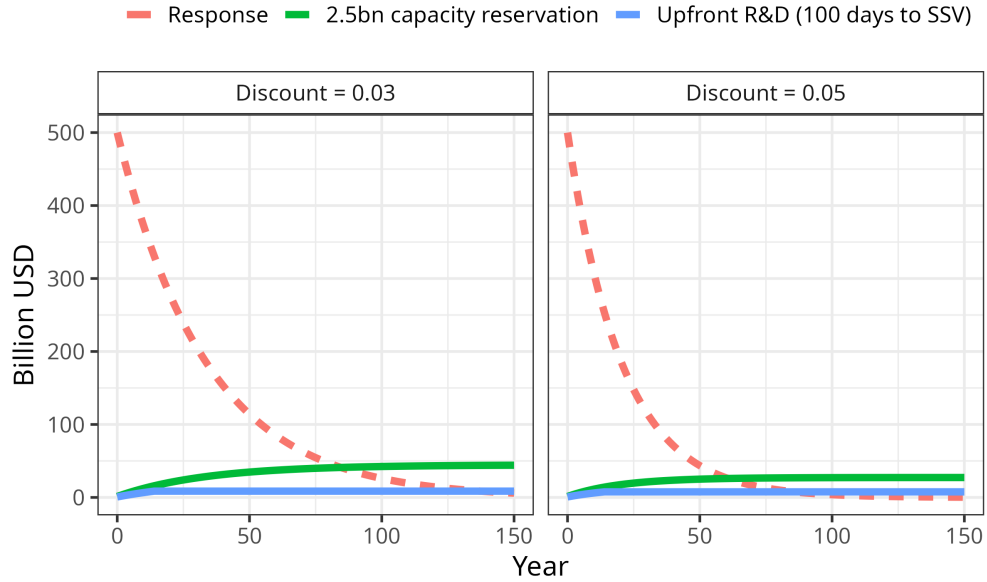

Figure C.7: **Relationships between costs, time, and discount rate.** For a representative response cost of 500 billion USD, we show how its value diminishes over time with two different rates of discounting, 3% and 5% (the IQR for the distribution used in our simulations). The  $y$  axis shows the present value of the instantaneous response cost in the event of a pandemic occurring in  $x$  years. For comparison, we show the present value of the cumulative cost over time of the most expensive upfront activity, namely 15 years of R&D to enable development of SSVs reactively in 100 days. We also show the present value of the most expensive annual cost accumulating, which is a capacity reservation of 2.5 billion doses. Present-value response costs can be expected to exceed other costs should a SARS-X pandemic occur in the next 61–85 years. Beyond this point, reservation costs continue accumulating, and response costs continue decreasing, going below the SSV R&D upfront cost 86–138 years into the future.

## C.2 Impact of preparedness and response investments

### C.2.1 Results for the epidemic library

#### C.2.1.1 Societal losses under alternative sector-closure policies among epidemic library candidates

In this section we present approximations of the losses caused by epidemics from randomly generated pathogens for synthetic countries by country archetype, sector-closure policy, and vaccination scenario, for the three losses separately and summed up. Because we are varying key parameters across 2,048 epidemics in countries within a category (LLMIC, UMIC, or HIC), there is a distribution over losses, and uncertainty in the approximated range of losses is therefore very high.

Our sector-closure policies are: no closures (NC, because no closures are mandated) and reactive closures 1 to 3 (RC1 to RC3, which use different rules and stringencies to reduce infections through closures). They are defined by economic configurations and rules for moving between them. An economic configuration is a vector specifying the extent to which each sector is open, expressed as a percentage, and provides the link between the economic projection and the epidemiological model. Our economic configurations are constructed using data from three countries (Indonesia (RC1), the United Kingdom (RC2 and RC3), and Australia (RC3)), via the manifest economic impacts in the wake of the COVID-19 pandemic. We take the sectoral GVA observed during the COVID-19 pandemic expressed as a percentage of the values observed in the year before, i.e. we assume that the relative GVA reflects the degree to which sectors were open. See Johnson et al.<sup>56</sup> for details of this implementation, which is based on Doohan et al..<sup>49</sup>

Table C.11 shows the interquartile range (IQR) of total societal losses associated with epidemics by sector-closure policy, scenario and synthetic country group and expressed as % of pre-epidemic GDP. The table shows first outcomes for the BAU scenario, followed by the advance investment scenarios. The columns YLL, Education and GDP give the average percentage of the total losses coming from each type of loss.

The sector-closure policy has marked impacts on losses across the three categories. For example, the NC policy results in high YLL, but low education and GDP losses. School and economic closure policies result in lower YLL, at the expense of higher education or GDP losses, respectively. RC3 results in the highest total societal losses, with the lowest YLL of all

policies, but high economic losses for UMIC and HIC.

Table C.11: **Societal losses of epidemics, by investment scenario, income country group, and sector-closure policy.** IQR of losses as % of pre-epidemic annual GDP.

| Scenario | Sector-closure policy | Income group | Total losses | YLL (%) | Education (%) | GDP (%) |
|----------|-----------------------|--------------|--------------|---------|---------------|---------|
| BAU      | NC                    | LLMIC        | 9.4–107.3    | 89      | 0.6           | 10.4    |
| BAU      | RC1                   | LLMIC        | 87.2–243.6   | 24.6    | 62.8          | 12.6    |
| BAU      | RC2                   | LLMIC        | 47.6–143.4   | 27.3    | 18.5          | 54.1    |
| BAU      | RC3                   | LLMIC        | 101.8–224.5  | 18      | 37.8          | 44.1    |
| BAU      | NC                    | UMIC         | 7.8–98.2     | 92.3    | 0.4           | 7.3     |
| BAU      | RC1                   | UMIC         | 39.4–135.2   | 34.4    | 51            | 14.6    |
| BAU      | RC2                   | UMIC         | 26.5–93.9    | 39.4    | 10            | 50.6    |
| BAU      | RC3                   | UMIC         | 64–125.6     | 15.4    | 30.6          | 54      |
| BAU      | NC                    | HIC          | 8.5–99.5     | 92.7    | 0.3           | 7       |
| BAU      | RC1                   | HIC          | 33.6–126.9   | 41.4    | 44            | 14.6    |
| BAU      | RC2                   | HIC          | 24.3–88.5    | 43.1    | 9.1           | 47.8    |
| BAU      | RC3                   | HIC          | 56.4–104.1   | 15      | 27.8          | 57.2    |
| S01      | NC                    | LLMIC        | 8.6–100.9    | 89.4    | 0.6           | 10      |
| S01      | RC1                   | LLMIC        | 77.3–219.6   | 24      | 63.1          | 12.8    |
| S01      | RC2                   | LLMIC        | 43–127.7     | 26.7    | 19.4          | 53.9    |
| S01      | RC3                   | LLMIC        | 94.5–204.6   | 16.2    | 38.9          | 44.9    |
| S01      | NC                    | UMIC         | 6.8–90.9     | 92.4    | 0.4           | 7.2     |
| S01      | RC1                   | UMIC         | 33.5–115.6   | 32.9    | 51.9          | 15.2    |
| S01      | RC2                   | UMIC         | 23.7–80.2    | 38      | 10.8          | 51.2    |
| S01      | RC3                   | UMIC         | 55.7–103.7   | 13.2    | 31.1          | 55.7    |
| S01      | NC                    | HIC          | 7.2–90.3     | 92.5    | 0.3           | 7.1     |
| S01      | RC1                   | HIC          | 27.6–99.4    | 38.8    | 45.6          | 15.6    |
| S01      | RC2                   | HIC          | 20.8–72.7    | 41.1    | 9.9           | 49      |
| S01      | RC3                   | HIC          | 46.7–82.2    | 12.3    | 28.4          | 59.2    |
| S02      | NC                    | LLMIC        | 9.1–106.9    | 89.7    | 0.6           | 9.7     |
| S02      | RC1                   | LLMIC        | 80.2–230.4   | 25.4    | 62.2          | 12.4    |
| S02      | RC2                   | LLMIC        | 44.5–136.9   | 28.5    | 19.1          | 52.4    |
| S02      | RC3                   | LLMIC        | 97.8–216.1   | 18.3    | 37.9          | 43.8    |
| S02      | NC                    | UMIC         | 7.8–98       | 92.4    | 0.4           | 7.2     |
| S02      | RC1                   | UMIC         | 39.3–134.7   | 34.3    | 51.1          | 14.5    |
| S02      | RC2                   | UMIC         | 26.3–93.4    | 39.5    | 10            | 50.6    |
| S02      | RC3                   | UMIC         | 63.4–124.1   | 15.1    | 30.7          | 54.2    |
| S02      | NC                    | HIC          | 8.5–99.4     | 92.7    | 0.3           | 7       |
| S02      | RC1                   | HIC          | 33.5–126.8   | 41.4    | 44            | 14.6    |
| S02      | RC2                   | HIC          | 24.2–88.5    | 43.2    | 9.1           | 47.7    |
| S02      | RC3                   | HIC          | 56.3–104     | 15      | 27.8          | 57.1    |
| S03      | NC                    | LLMIC        | 9–106.6      | 90      | 0.6           | 9.4     |
| S03      | RC1                   | LLMIC        | 77–224       | 25.9    | 61.7          | 12.3    |
| S03      | RC2                   | LLMIC        | 42.9–132.7   | 28.6    | 19.5          | 51.9    |
| S03      | RC3                   | LLMIC        | 93.4–206.5   | 18.3    | 38.1          | 43.6    |
| S03      | NC                    | UMIC         | 7.7–98       | 92.4    | 0.4           | 7.2     |
| S03      | RC1                   | UMIC         | 38.9–133.7   | 34.4    | 51.1          | 14.5    |

| Scenario | Sector-closure policy | Income group | Total losses | YLL (%) | Education (%) | GDP (%) |
|----------|-----------------------|--------------|--------------|---------|---------------|---------|
| S03      | RC2                   | UMIC         | 26.2–92.3    | 39.4    | 10            | 50.6    |
| S03      | RC3                   | UMIC         | 63.2–123.2   | 14.9    | 30.9          | 54.3    |
| S03      | NC                    | HIC          | 8.5–99.4     | 92.7    | 0.3           | 7       |
| S03      | RC1                   | HIC          | 33.4–126.7   | 41.4    | 44            | 14.6    |
| S03      | RC2                   | HIC          | 24.2–88.3    | 43.2    | 9.1           | 47.7    |
| S03      | RC3                   | HIC          | 56–103.9     | 15      | 27.8          | 57.1    |
| S04      | NC                    | LLMIC        | 8.9–106.9    | 89.8    | 0.6           | 9.6     |
| S04      | RC1                   | LLMIC        | 76.9–222.5   | 25.6    | 61.9          | 12.5    |
| S04      | RC2                   | LLMIC        | 43–134.1     | 28.2    | 19.5          | 52.3    |
| S04      | RC3                   | LLMIC        | 89.9–197     | 19.1    | 38.2          | 42.7    |
| S04      | NC                    | UMIC         | 7.1–97       | 93.6    | 0.4           | 6       |
| S04      | RC1                   | UMIC         | 33–122.4     | 37.4    | 48.6          | 14      |
| S04      | RC2                   | UMIC         | 22.7–84.8    | 41.1    | 11.2          | 47.7    |
| S04      | RC3                   | UMIC         | 52.5–105.5   | 16      | 31.2          | 52.8    |
| S04      | NC                    | HIC          | 7.7–97.7     | 93.6    | 0.3           | 6.1     |
| S04      | RC1                   | HIC          | 27.2–114.9   | 45.4    | 40.8          | 13.8    |
| S04      | RC2                   | HIC          | 20.4–79.3    | 44.9    | 10            | 45.1    |
| S04      | RC3                   | HIC          | 43.5–83.5    | 15.1    | 28.4          | 56.5    |
| S05      | NC                    | LLMIC        | 8.2–102.8    | 91.7    | 0.6           | 7.7     |
| S05      | RC1                   | LLMIC        | 60.8–186     | 28.1    | 59.9          | 12      |
| S05      | RC2                   | LLMIC        | 35.5–116.2   | 30.3    | 21.3          | 48.5    |
| S05      | RC3                   | LLMIC        | 72.7–161     | 18.8    | 39.5          | 41.7    |
| S05      | NC                    | UMIC         | 7.3–96.1     | 92.8    | 0.4           | 6.8     |
| S05      | RC1                   | UMIC         | 35.2–124     | 35.4    | 50.2          | 14.3    |
| S05      | RC2                   | UMIC         | 24.1–86.3    | 39.9    | 10.6          | 49.6    |
| S05      | RC3                   | UMIC         | 55.9–110.8   | 14.9    | 30.9          | 54.2    |
| S05      | NC                    | HIC          | 8–98.5       | 92.7    | 0.3           | 7       |
| S05      | RC1                   | HIC          | 31.5–120.9   | 41.5    | 44            | 14.6    |
| S05      | RC2                   | HIC          | 23.1–83.5    | 42.8    | 9.3           | 47.8    |
| S05      | RC3                   | HIC          | 51.7–95      | 14.5    | 27.9          | 57.6    |
| S06      | NC                    | LLMIC        | 8.1–101.4    | 91.7    | 0.6           | 7.6     |
| S06      | RC1                   | LLMIC        | 59.1–182.6   | 28.2    | 59.8          | 11.9    |
| S06      | RC2                   | LLMIC        | 34.9–114.6   | 30.2    | 21.5          | 48.3    |
| S06      | RC3                   | LLMIC        | 70.9–156.5   | 19.1    | 39.3          | 41.6    |
| S06      | NC                    | UMIC         | 7.1–95.8     | 92.8    | 0.4           | 6.8     |
| S06      | RC1                   | UMIC         | 34.5–123     | 35.5    | 50.2          | 14.4    |
| S06      | RC2                   | UMIC         | 23.7–85.4    | 39.9    | 10.6          | 49.5    |
| S06      | RC3                   | UMIC         | 54.7–108.6   | 14.8    | 30.8          | 54.3    |
| S06      | NC                    | HIC          | 7.9–98       | 92.7    | 0.3           | 7       |
| S06      | RC1                   | HIC          | 31.1–118.1   | 41.6    | 43.8          | 14.5    |
| S06      | RC2                   | HIC          | 22.7–82.7    | 42.9    | 9.4           | 47.7    |
| S06      | RC3                   | HIC          | 50.9–93.1    | 14.3    | 27.9          | 57.7    |
| S07      | NC                    | LLMIC        | 8.6–106.1    | 90.4    | 0.6           | 9       |
| S07      | RC1                   | LLMIC        | 71.5–210.7   | 26.4    | 61.3          | 12.4    |
| S07      | RC2                   | LLMIC        | 40.3–128     | 28.5    | 20.3          | 51.2    |
| S07      | RC3                   | LLMIC        | 82.7–182.8   | 19.2    | 38.8          | 42      |
| S07      | NC                    | UMIC         | 6.7–94.8     | 94.3    | 0.4           | 5.3     |

| Scenario | Sector-closure policy | Income group | Total losses | YLL (%) | Education (%) | GDP (%) |
|----------|-----------------------|--------------|--------------|---------|---------------|---------|
| S07      | RC1                   | UMIC         | 29.1–114.8   | 39.8    | 46.5          | 13.7    |
| S07      | RC2                   | UMIC         | 20.5–79.7    | 42.4    | 11.7          | 45.9    |
| S07      | RC3                   | UMIC         | 45.1–93      | 16.3    | 31.5          | 52.1    |
| S07      | NC                    | HIC          | 6.9–95.3     | 94.3    | 0.3           | 5.4     |
| S07      | RC1                   | HIC          | 22.7–102.4   | 47.3    | 39            | 13.6    |
| S07      | RC2                   | HIC          | 17.5–70.7    | 45.5    | 10.7          | 43.8    |
| S07      | RC3                   | HIC          | 35.7–69.5    | 15.3    | 28.4          | 56.3    |
| S08      | NC                    | LLMIC        | 7.8–97.5     | 92.1    | 0.6           | 7.3     |
| S08      | RC1                   | LLMIC        | 54.1–170.8   | 28.8    | 59.4          | 11.8    |
| S08      | RC2                   | LLMIC        | 32.4–108.1   | 30.4    | 22.1          | 47.5    |
| S08      | RC3                   | LLMIC        | 64.5–142.2   | 18.8    | 39.6          | 41.6    |
| S08      | NC                    | UMIC         | 6.7–93.2     | 93.5    | 0.4           | 6.1     |
| S08      | RC1                   | UMIC         | 31.2–115.9   | 37      | 48.9          | 14.1    |
| S08      | RC2                   | UMIC         | 21.8–80.5    | 40.9    | 11.1          | 48      |
| S08      | RC3                   | UMIC         | 48.8–98.3    | 15.5    | 31.1          | 53.4    |
| S08      | NC                    | HIC          | 7.5–96.2     | 93.2    | 0.3           | 6.5     |
| S08      | RC1                   | HIC          | 27.3–107     | 42.9    | 42.7          | 14.4    |
| S08      | RC2                   | HIC          | 20.2–76.4    | 43.4    | 9.8           | 46.7    |
| S08      | RC3                   | HIC          | 44.2–81.9    | 14      | 28.2          | 57.7    |
| S09      | NC                    | LLMIC        | 7.6–96.1     | 92.2    | 0.7           | 7.2     |
| S09      | RC1                   | LLMIC        | 52.5–165.2   | 28.9    | 59.3          | 11.8    |
| S09      | RC2                   | LLMIC        | 31.6–104.4   | 30.2    | 22.3          | 47.6    |
| S09      | RC3                   | LLMIC        | 62.6–137.9   | 18.3    | 39.8          | 41.8    |
| S09      | NC                    | UMIC         | 6.6–92.4     | 93.5    | 0.4           | 6       |
| S09      | RC1                   | UMIC         | 30.6–114.3   | 36.9    | 49            | 14.2    |
| S09      | RC2                   | UMIC         | 21.2–79.1    | 40.7    | 11.2          | 48.1    |
| S09      | RC3                   | UMIC         | 47.8–95      | 15.2    | 31.1          | 53.7    |
| S09      | NC                    | HIC          | 7.3–95.5     | 93.2    | 0.3           | 6.5     |
| S09      | RC1                   | HIC          | 26.8–106.5   | 42.9    | 42.7          | 14.4    |
| S09      | RC2                   | HIC          | 19.8–75      | 43.3    | 9.9           | 46.8    |
| S09      | RC3                   | HIC          | 43–80.3      | 13.9    | 28.3          | 57.7    |
| S10      | NC                    | LLMIC        | 8.6–105.7    | 91.6    | 0.6           | 7.8     |
| S10      | RC1                   | LLMIC        | 65.3–199.1   | 27.9    | 60.1          | 12      |
| S10      | RC2                   | LLMIC        | 38.2–124.9   | 30.7    | 20.9          | 48.5    |
| S10      | RC3                   | LLMIC        | 82–181.9     | 19.6    | 39.1          | 41.4    |
| S10      | NC                    | UMIC         | 7.8–98.3     | 91.8    | 0.4           | 7.8     |
| S10      | RC1                   | UMIC         | 42.1–139.8   | 32.8    | 52.4          | 14.8    |
| S10      | RC2                   | UMIC         | 28.3–95.5    | 38.1    | 9.6           | 52.2    |
| S10      | RC3                   | UMIC         | 68.2–132     | 14.8    | 30.3          | 54.9    |
| S10      | NC                    | HIC          | 8.8–100.3    | 91.9    | 0.3           | 7.8     |
| S10      | RC1                   | HIC          | 38.4–131.8   | 38.3    | 46.5          | 15.2    |
| S10      | RC2                   | HIC          | 27.2–93.4    | 41.4    | 8.5           | 50.1    |
| S10      | RC3                   | HIC          | 64.6–115.5   | 14.3    | 27.3          | 58.4    |

1316 Some distributions, notably those for GDP losses under the RC3 strategy, are bimodal.

1317 This means that samples group into two distinct types, those with higher losses and those

1318 with lower losses, with few samples having losses that fall in between. This is due to the  
 1319 construction of the closure policies, which each consist of two economic configurations, one  
 1320 of which is more stringent than the other. The higher-loss projections likely correspond to  
 1321 epidemics that result in heavy closures for the whole duration, based on the closure rules,  
 1322 while the lower-loss projections correspond to epidemics that result in heavy closures for a  
 1323 short period only. Outbreaks are either easily controlled with just a short closure, or they  
 1324 require stringent interventions.

1325 **C.2.1.2 Societal losses under the loss-minimising sector closure policy in**  
 1326 **the epidemic library** From among the four sector-closure policy options considered in  
 1327 Section C.2.1.1 for each scenario–country combination, we select the loss-minimising option  
 1328 for each epidemic and retain it for inclusion in a library of epidemics. Results analogous to  
 1329 those of Section C.2.1.1 are shown in Table C.12.

1330 Among epidemics that are least severe, NC is most often the loss-minimising policy. In  
 1331 contrast, among severe epidemics, closures are more often chosen as they reduce overall societal  
 1332 losses, which means that, in this space, YLL can be decreased at the expense of higher economic  
 1333 and educational losses with a net societal benefit overall.

Table C.12: **Losses (IQR) for all investment scenarios and country types**, taking the loss-minimising epidemic from the four sector closure policy options in Table C.11.

| Scenario | Income group | Total losses | YLL (%) | Education (%) | GDP (%) |
|----------|--------------|--------------|---------|---------------|---------|
| BAU      | LLMIC        | 9.4–97.5     | 85.4    | 1.3           | 13.2    |
| BAU      | UMIC         | 7.8–77.2     | 83      | 2.8           | 14.2    |
| BAU      | HIC          | 8.5–72.2     | 79      | 4.2           | 16.8    |
| S01      | LLMIC        | 8.6–89.8     | 84.6    | 1.9           | 13.5    |
| S01      | UMIC         | 6.8–65.6     | 81.3    | 3.5           | 15.2    |
| S01      | HIC          | 7.1–57.2     | 76      | 5.3           | 18.7    |
| S02      | LLMIC        | 9.1–95.4     | 85.4    | 1.6           | 13      |
| S02      | UMIC         | 7.7–76.1     | 82.9    | 2.9           | 14.2    |
| S02      | HIC          | 8.5–71.8     | 78.8    | 4.4           | 16.8    |
| S03      | LLMIC        | 9–92.8       | 85.1    | 1.7           | 13.1    |
| S03      | UMIC         | 7.7–75.6     | 82.9    | 2.8           | 14.3    |
| S03      | HIC          | 8.5–71.8     | 78.8    | 4.4           | 16.8    |
| S04      | LLMIC        | 8.9–92.7     | 85.1    | 1.7           | 13.2    |
| S04      | UMIC         | 7.1–69.2     | 81.3    | 4             | 14.8    |
| S04      | HIC          | 7.6–61.2     | 75.4    | 5.7           | 18.9    |
| S05      | LLMIC        | 8.2–84       | 84.7    | 2.6           | 12.7    |

| Scenario | Income group | Total losses | YLL (%) | Education (%) | GDP (%) |
|----------|--------------|--------------|---------|---------------|---------|
| S05      | UMIC         | 7.3–70.2     | 81.6    | 3.3           | 15.1    |
| S05      | HIC          | 8–66.5       | 77.6    | 4.7           | 17.6    |
| S06      | LLMIC        | 8.1–82.5     | 84.6    | 2.6           | 12.7    |
| S06      | UMIC         | 7.1–69.3     | 81.4    | 3.3           | 15.2    |
| S06      | HIC          | 7.9–65.7     | 77.1    | 4.9           | 18      |
| S07      | LLMIC        | 8.6–90.4     | 84.9    | 2             | 13.1    |
| S07      | UMIC         | 6.7–63.8     | 80.3    | 4.6           | 15.1    |
| S07      | HIC          | 6.9–53.3     | 73.6    | 6.6           | 19.8    |
| S08      | LLMIC        | 7.8–79.6     | 83.7    | 3.1           | 13.2    |
| S08      | UMIC         | 6.7–65.1     | 80.9    | 3.9           | 15.2    |
| S08      | HIC          | 7.4–59.4     | 75.9    | 5.4           | 18.6    |
| S09      | LLMIC        | 7.6–77.6     | 83.4    | 3.3           | 13.3    |
| S09      | UMIC         | 6.6–63.9     | 80.8    | 4             | 15.2    |
| S09      | HIC          | 7.3–58.4     | 75.5    | 5.7           | 18.8    |
| S10      | LLMIC        | 8.6–89.3     | 85.8    | 2.1           | 12.1    |
| S10      | UMIC         | 7.8–78       | 83.2    | 2.5           | 14.4    |
| S10      | HIC          | 8.8–76.6     | 79.8    | 3.7           | 16.5    |

### C.2.1.3 Societal losses averted by advance vaccine investments under the loss-minimising sector closure policy in the epidemic library

We approximate the losses averted by advance vaccine investments under the loss-minimising sector closure policy in the epidemic library as the difference in losses between a scenario and BAU, where in each case the loss is the least it can be given the sector-closure options considered. The IQR of losses averted with the investment scenarios for the library of epidemics are tabulated in Table C.13. As with the epidemic losses shown in Table C.12, there is high variability in losses averted in the epidemic library (Table C.13), with high density close to zero and some extreme losses averted.

Table C.13: **Epidemic losses averted by advance vaccine investments.** IQR, % of annual pre-epidemic GDP. Epidemic losses averted by advance vaccine investments, having selected the loss-minimising sector closure policy in the epidemic library, expressed as a percent of annual pre-epidemic GDP; shown is the IQR of 2,048 samples, rounded to two significant figures; shown are the  $\Delta$ LIR of all scenarios when compared against BAU.

| Scenario | Income group | Epidemic library losses averted (% of GDP) |
|----------|--------------|--------------------------------------------|
| S01      | LLMIC        | 0.21–4.9                                   |
| S02      | LLMIC        | 0.035–0.75                                 |
| S03      | LLMIC        | 0.09–1.8                                   |

| Scenario | Income group | Epidemic library losses averted (% of GDP) |
|----------|--------------|--------------------------------------------|
| S04      | LLMIC        | 0.1–1.5                                    |
| S05      | LLMIC        | 0.33–5.5                                   |
| S06      | LLMIC        | 0.36–6.3                                   |
| S07      | LLMIC        | 0.17–2.6                                   |
| S08      | LLMIC        | 0.48–8.2                                   |
| S09      | LLMIC        | 0.52–9.8                                   |
| S10      | LLMIC        | 0.24–3.3                                   |
| S01      | UMIC         | 0.29–6.5                                   |
| S02      | UMIC         | 0.0031–0.14                                |
| S03      | UMIC         | 0.012–0.36                                 |
| S04      | UMIC         | 0.17–3.5                                   |
| S05      | UMIC         | 0.13–2.7                                   |
| S06      | UMIC         | 0.16–3.2                                   |
| S07      | UMIC         | 0.28–6                                     |
| S08      | UMIC         | 0.28–5.5                                   |
| S09      | UMIC         | 0.33–6.5                                   |
| S10      | UMIC         | -0.57–0.022                                |
| S01      | HIC          | 0.44–8.8                                   |
| S02      | HIC          | 0.0033–0.061                               |
| S03      | HIC          | 0.0081–0.16                                |
| S04      | HIC          | 0.29–4.9                                   |
| S05      | HIC          | 0.097–2.2                                  |
| S06      | HIC          | 0.12–2.7                                   |
| S07      | HIC          | 0.56–9.8                                   |
| S08      | HIC          | 0.34–6.5                                   |
| S09      | HIC          | 0.38–7.4                                   |
| S10      | HIC          | -2.4–0.13                                  |

## C.2.2 Exceedance probabilities

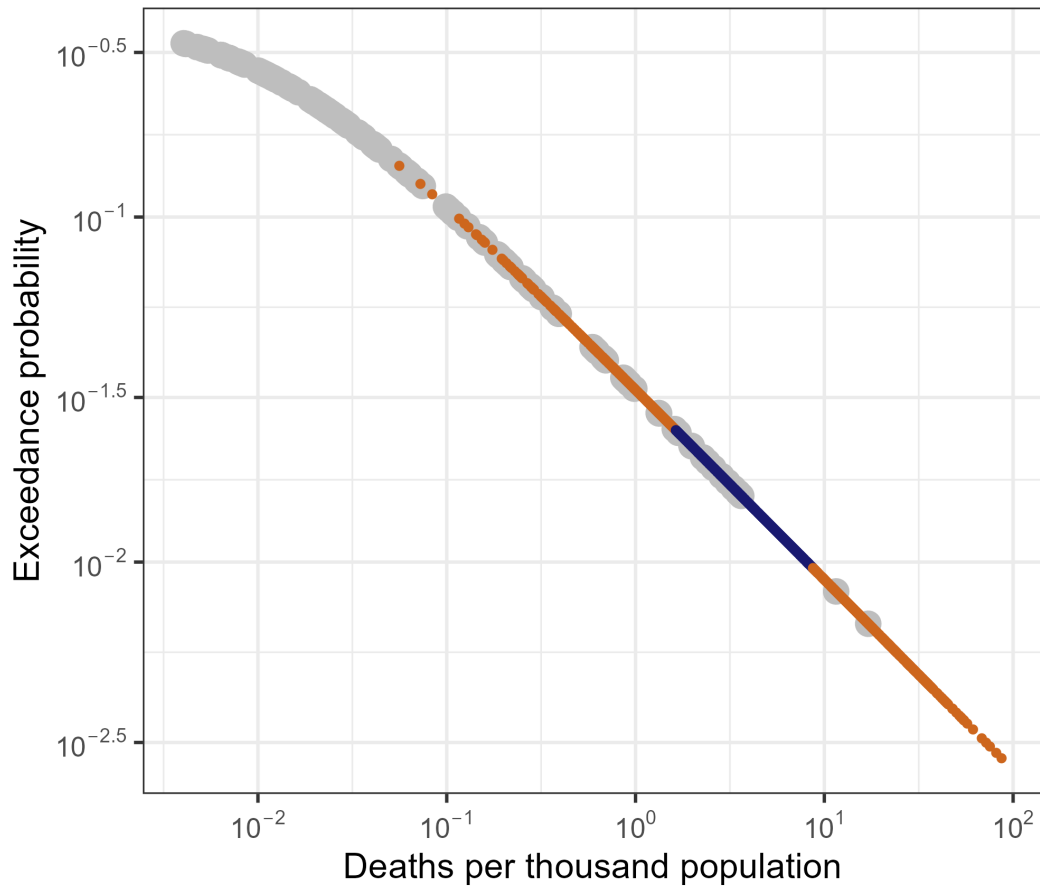

Figure C.8: **Exceedance probabilities of pandemics as a function of severity.** We map pandemic outcomes (deaths per thousand population) onto exceedance probabilities using a generalised Pareto distribution fitted to the data in Marani et al..<sup>45</sup> In grey are the numbers of deaths per thousand population in the data shown against the corresponding exceedance probability. In orange and blue the numbers of deaths per thousand of our synthetic pandemics and the corresponding exceedance probabilities using the function fit to the historical data. Blue points are those lying within the interquartile range.

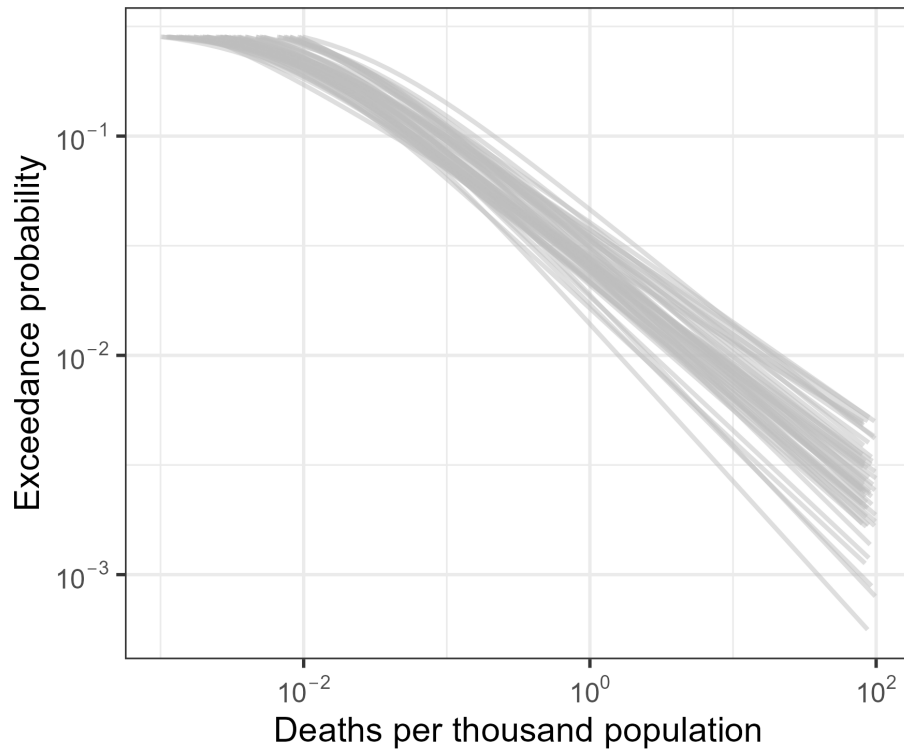

Figure C.9: **Exceedance probabilities of pandemics as a function of severity with sampled location parameters.** Lines show relationships generated by fitting generalised Pareto distributions when the location parameter is sampled and epidemics constituting the dataset are resampled with replacement.

1344

### C.2.3 Losses under business as usual

1345

Table C.14 presents estimates of losses under ideal response ( $\Delta$ LIR) for the counterfactual

1346

BAU scenario with limited advance investments into vaccines for pandemics of varying severity.

Table C.14: **Total societal losses and deaths under BAU**

|                                                                              | LIR, % global GDP | Deaths per thousand |
|------------------------------------------------------------------------------|-------------------|---------------------|
| <b>Expectation</b>                                                           | 0.39–1.1          | 0.023–0.063         |
| <i>Conditional on pandemic severity and SARS-X being the causative agent</i> |                   |                     |
| <b>Once in thirty years</b>                                                  | 15–21             | 1.1–1.5             |
| <b>Once in forty years</b>                                                   | 20–32             | 1.4–2.1             |
| <b>Once in fifty years</b>                                                   | 27–41             | 1.8–2.6             |
| <b>Once in sixty years</b>                                                   | 33–51             | 2.1–3.1             |
| <b>Once in seventy years</b>                                                 | 39–61             | 2.5–3.6             |
| <b>Once in eighty years</b>                                                  | 44–73             | 2.8–4.2             |
| <b>Once in ninety years</b>                                                  | 50–83             | 3.1–4.7             |
| <b>Once in one hundred years</b>                                             | 56–92             | 3.3–5.3             |

1347

### C.2.4 Impact of advance investments into vaccines

1348

Table 2 presents estimates of annualised differences in losses under ideal response ( $\Delta$ LIR) by

1349

advance investments in vaccines for all investment scenarios compared to losses under BAU.

1350

To illustrate the impacts of different (ac)counting assumptions on results, Table C.15

1351

shows examples where  $\Delta$ LIR is accumulated over a number of years using different temporal

1352

assumptions. Interested readers can enter their own values and generate their own results

1353

using the provided Supplementary Table (currently residing at [https://docs.google.com/spreadsheets/d/1eeeCgBZlPtiz3ziO4YKiXjAb7PA1tEmp\\_J6D33yikwY/edit?usp=sharing](https://docs.google.com/spreadsheets/d/1eeeCgBZlPtiz3ziO4YKiXjAb7PA1tEmp_J6D33yikwY/edit?usp=sharing)).

1354

Table C.15: **Expected value of investments for different temporal assumptions in present-value USD; trillions (2025 prices)**. All examples start with a global GDP of 113.8 trillion USD in 2025. Accumulation begins in 2040 for Examples 3 and 4, and 2050 for Examples 1 and 2. It ends in 2099 for Examples 1, 2 and 3, and 2089 for Example 4. Growth and discount rates are both 0.023 for Examples 1 and 3, and growth is 0.03 and discount 0.04 for Examples 2 and 4.

|                            | Example 1 | Example 2 | Example 3 | Example 4 |
|----------------------------|-----------|-----------|-----------|-----------|
| <i>Accumulation inputs</i> |           |           |           |           |
| Discount rate              | 0.023     | 0.04      | 0.023     | 0.04      |
| Growth rate                | 0.023     | 0.03      | 0.023     | 0.03      |

|                                                       | Example 1 | Example 2 | Example 3 | Example 4 |
|-------------------------------------------------------|-----------|-----------|-----------|-----------|
| Time horizon                                          | 2050–2099 | 2050–2099 | 2040–2099 | 2040–2089 |
| <i>Results by scenario; trillion USD, 2025 prices</i> |           |           |           |           |
| S01                                                   | 2.2–6.3   | 1.3–3.9   | 2.6–7.5   | 1.5–4.2   |
| S02                                                   | 0.22–0.63 | 0.14–0.39 | 0.27–0.75 | 0.15–0.42 |
| S03                                                   | 0.39–1.1  | 0.24–0.67 | 0.47–1.3  | 0.27–0.73 |
| S04                                                   | 0.91–2.5  | 0.56–1.5  | 1.1–3     | 0.62–1.7  |
| S05                                                   | 1.4–3.8   | 0.84–2.3  | 1.6–4.5   | 0.93–2.5  |
| S06                                                   | 1.6–4.3   | 0.98–2.7  | 1.9–5.2   | 1.1–2.9   |
| S07                                                   | 1.6–4.4   | 0.98–2.7  | 1.9–5.3   | 1.1–3     |
| S08                                                   | 2.3–6.3   | 1.4–3.9   | 2.7–7.5   | 1.5–4.2   |
| S09                                                   | 2.6–7.4   | 1.6–4.6   | 3.1–8.9   | 1.8–5     |
| S10                                                   | 0.43–1.2  | 0.27–0.74 | 0.52–1.4  | 0.29–0.81 |

1355 Table C.16 presents the  $\Delta$ LIR of advance investments in the cases that pandemics of  
1356 specific severities occur, and assuming the pandemic is caused by SARS-X. Note that not all  
1357 pandemics with a severity we would expect to see once in every thirty years will be caused by  
1358 SARS-X. Therefore, investments will not have impact in every once-in-thirty-years pandemic,  
1359 but only for the subset of pandemics caused by SARS-X with a severity we would expect to  
1360 see once in every thirty years.

1361  $\Delta$ LIR values are given in terms of % of counterfactual pandemic losses as well as percent  
1362 of contemporaneous global GDP (Table C.14). Note that  $\Delta$ LIR of investments decrease in  
1363 terms of counterfactual pandemic losses as pandemics become more severe, but increase as  
1364 a percentage of GDP. This is because overall the losses are greater for severe pandemics, so  
1365 there is more to be gained in advance investments. The smaller losses of milder pandemics are  
1366 more successfully averted with advance investments, compared to greater losses of more severe  
1367 pandemics.

Table C.16:  **$\Delta$ LIR of advance vaccine investments in pandemics of specified severities conditional on the pandemic having been caused by SARS-X** Note: Estimates are conditional on the pandemic having been caused by SARS-X

| Probability          | Scenario | $\Delta$ LIR, % of counterfactual | $\Delta$ LIR, % GDP |
|----------------------|----------|-----------------------------------|---------------------|
| Once in thirty years | S01      | 8.7–10                            | 1.3–2.1             |
| Once in thirty years | S02      | 1–1.5                             | 0.17–0.29           |
| Once in thirty years | S03      | 2–2.7                             | 0.32–0.53           |
| Once in thirty years | S04      | 4.7–5.6                           | 0.71–1.1            |
| Once in thirty years | S05      | 7–8.5                             | 1.1–1.7             |

| Probability           | Scenario | $\Delta$ LIR, %<br>counterfactual | $\Delta$ LIR, % GDP |
|-----------------------|----------|-----------------------------------|---------------------|
| Once in thirty years  | S06      | 7.9–9.5                           | 1.2–1.9             |
| Once in thirty years  | S07      | 8.1–9.6                           | 1.2–1.9             |
| Once in thirty years  | S08      | 11–13                             | 1.7–2.7             |
| Once in thirty years  | S09      | 12–15                             | 1.9–3               |
| Once in thirty years  | S10      | 1.9–2.9                           | 0.3–0.56            |
| Once in forty years   | S01      | 8.9–11                            | 1.9–3.1             |
| Once in forty years   | S02      | 1.1–1.5                           | 0.24–0.43           |
| Once in forty years   | S03      | 2–2.7                             | 0.44–0.75           |
| Once in forty years   | S04      | 4.7–5.6                           | 1–1.6               |
| Once in forty years   | S05      | 6.9–8.5                           | 1.5–2.5             |
| Once in forty years   | S06      | 7.9–9.5                           | 1.7–2.8             |
| Once in forty years   | S07      | 8.2–9.7                           | 1.8–2.8             |
| Once in forty years   | S08      | 11–13                             | 2.4–4               |
| Once in forty years   | S09      | 12–15                             | 2.7–4.4             |
| Once in forty years   | S10      | 1.9–2.9                           | 0.43–0.8            |
| Once in fifty years   | S01      | 9–11                              | 2.6–4.2             |
| Once in fifty years   | S02      | 1.1–1.5                           | 0.31–0.58           |
| Once in fifty years   | S03      | 2–2.6                             | 0.59–1              |
| Once in fifty years   | S04      | 4.7–5.6                           | 1.4–2.2             |
| Once in fifty years   | S05      | 7–8.5                             | 2–3.3               |
| Once in fifty years   | S06      | 7.9–9.6                           | 2.3–3.7             |
| Once in fifty years   | S07      | 8.2–9.8                           | 2.4–3.7             |
| Once in fifty years   | S08      | 11–13                             | 3.2–5.2             |
| Once in fifty years   | S09      | 13–15                             | 3.6–5.9             |
| Once in fifty years   | S10      | 1.9–3                             | 0.57–1.1            |
| Once in sixty years   | S01      | 9.1–11                            | 3.2–5.3             |
| Once in sixty years   | S02      | 1.1–1.6                           | 0.39–0.72           |
| Once in sixty years   | S03      | 2–2.6                             | 0.71–1.2            |
| Once in sixty years   | S04      | 4.6–5.6                           | 1.6–2.7             |
| Once in sixty years   | S05      | 7–8.5                             | 2.5–4.1             |
| Once in sixty years   | S06      | 7.9–9.6                           | 2.8–4.6             |
| Once in sixty years   | S07      | 8.1–9.8                           | 2.9–4.7             |
| Once in sixty years   | S08      | 11–14                             | 4–6.5               |
| Once in sixty years   | S09      | 13–15                             | 4.5–7.3             |
| Once in sixty years   | S10      | 1.9–3                             | 0.71–1.4            |
| Once in seventy years | S01      | 9.2–11                            | 3.8–6.4             |
| Once in seventy years | S02      | 1.1–1.5                           | 0.46–0.85           |
| Once in seventy years | S03      | 1.9–2.6                           | 0.86–1.5            |
| Once in seventy years | S04      | 4.6–5.6                           | 1.9–3.2             |
| Once in seventy years | S05      | 6.9–8.5                           | 2.9–4.9             |
| Once in seventy years | S06      | 7.9–9.6                           | 3.3–5.6             |
| Once in seventy years | S07      | 8.1–9.8                           | 3.4–5.6             |
| Once in seventy years | S08      | 11–14                             | 4.7–7.9             |
| Once in seventy years | S09      | 13–15                             | 5.3–8.9             |
| Once in seventy years | S10      | 1.9–2.9                           | 0.84–1.6            |
| Once in eighty years  | S01      | 9.3–11                            | 4.4–7.6             |
| Once in eighty years  | S02      | 1.1–1.5                           | 0.54–0.97           |

| Probability                  | Scenario | $\Delta$ LIR, %<br>counterfactual | $\Delta$ LIR, % GDP |
|------------------------------|----------|-----------------------------------|---------------------|
| Once in eighty years         | S03      | 1.9–2.6                           | 0.99–1.7            |
| Once in eighty years         | S04      | 4.5–5.5                           | 2.3–3.7             |
| Once in eighty years         | S05      | 6.9–8.4                           | 3.4–5.7             |
| Once in eighty years         | S06      | 7.9–9.6                           | 3.8–6.5             |
| Once in eighty years         | S07      | 8–9.7                             | 3.9–6.4             |
| Once in eighty years         | S08      | 11–14                             | 5.5–9.2             |
| Once in eighty years         | S09      | 13–15                             | 6.2–10              |
| Once in eighty years         | S10      | 2–2.9                             | 0.99–1.8            |
| Once in ninety years         | S01      | 9.3–11                            | 5–8.5               |
| Once in ninety years         | S02      | 1–1.5                             | 0.61–1.1            |
| Once in ninety years         | S03      | 1.9–2.6                           | 1.1–1.9             |
| Once in ninety years         | S04      | 4.4–5.5                           | 2.5–4.1             |
| Once in ninety years         | S05      | 6.8–8.4                           | 3.8–6.5             |
| Once in ninety years         | S06      | 7.8–9.5                           | 4.3–7.3             |
| Once in ninety years         | S07      | 7.9–9.5                           | 4.4–7.1             |
| Once in ninety years         | S08      | 11–14                             | 6.2–11              |
| Once in ninety years         | S09      | 13–15                             | 7–12                |
| Once in ninety years         | S10      | 2–2.9                             | 1.1–2.1             |
| Once in one hundred<br>years | S01      | 9.3–11                            | 5.6–9.9             |
| Once in one hundred<br>years | S02      | 1–1.5                             | 0.67–1.2            |
| Once in one hundred<br>years | S03      | 1.9–2.5                           | 1.2–2               |
| Once in one hundred<br>years | S04      | 4.3–5.4                           | 2.8–4.4             |
| Once in one hundred<br>years | S05      | 6.8–8.3                           | 4.2–7               |
| Once in one hundred<br>years | S06      | 7.8–9.5                           | 4.8–8               |
| Once in one hundred<br>years | S07      | 7.8–9.4                           | 4.9–7.9             |
| Once in one hundred<br>years | S08      | 11–13                             | 6.8–12              |
| Once in one hundred<br>years | S09      | 13–15                             | 7.6–13              |
| Once in one hundred<br>years | S10      | 2–2.8                             | 1.2–2.4             |

## C.2.5 Supplementary figures for the impact model

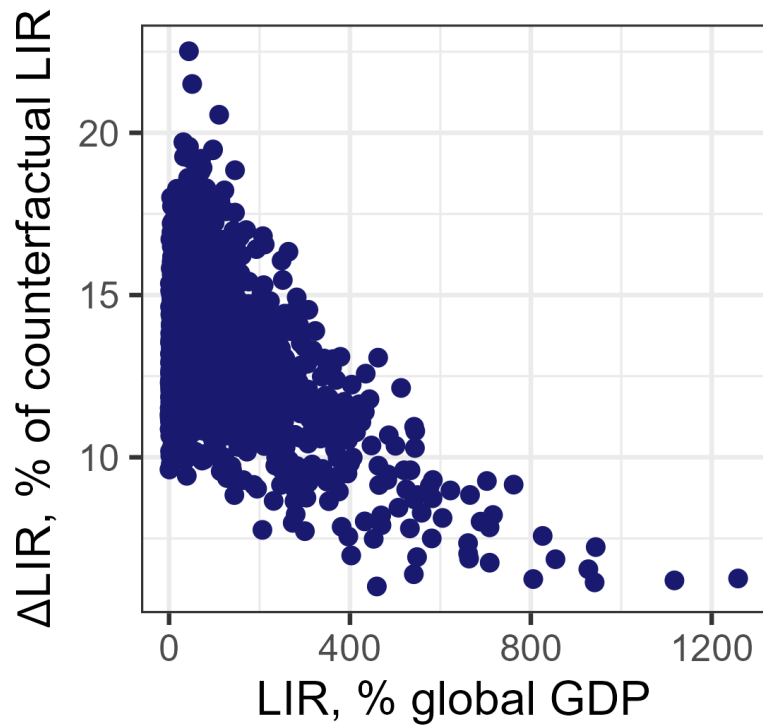

Figure C.10:  $\Delta$ LIR as % of loss vs. loss as a % of GDP for S09. When the loss is low, as much as 20% of losses can be averted with investment. For high losses, however, only 5% might be expected to be averted.

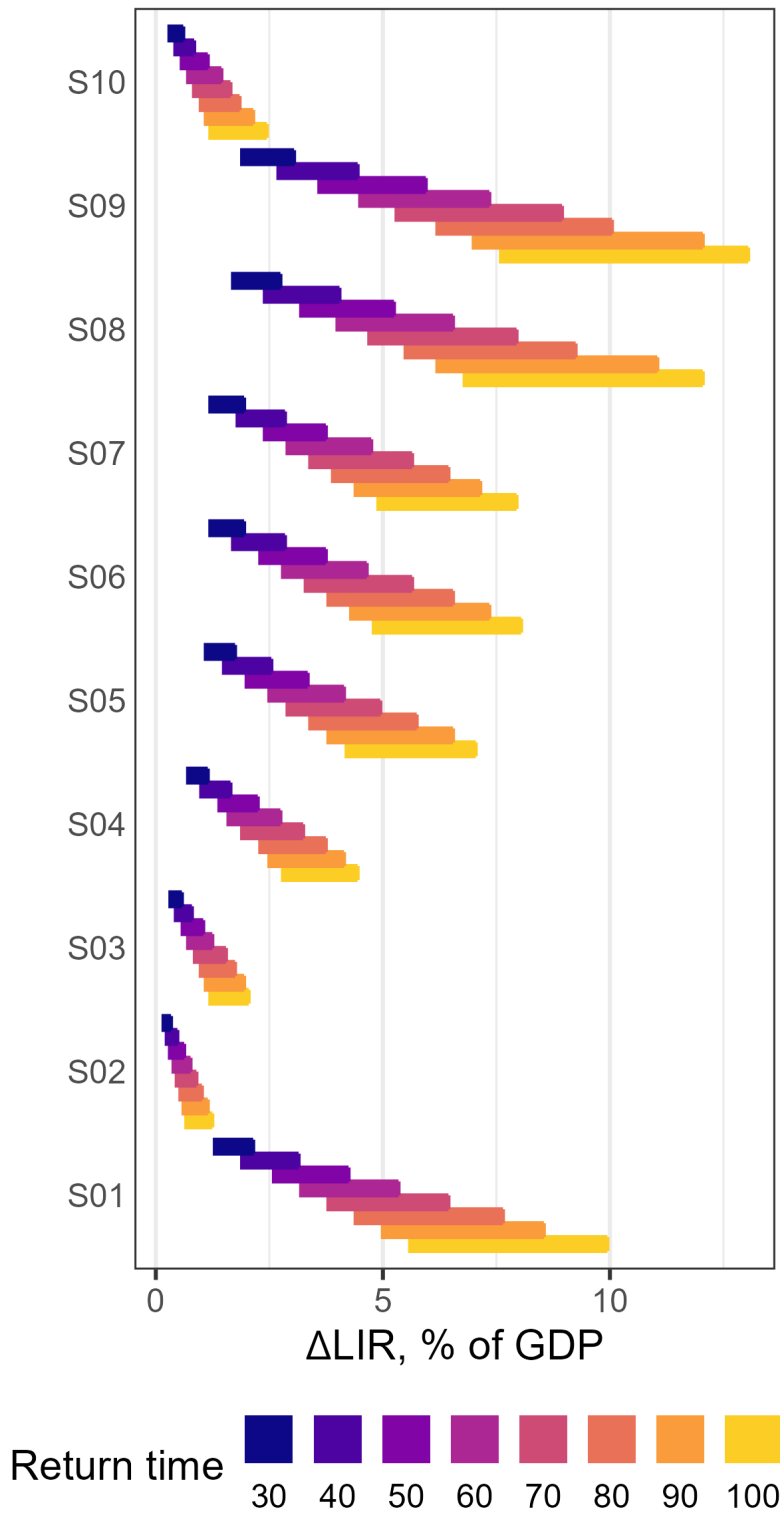

Figure C.11:  $\Delta\text{LIR}$  as a % of global GDP for different pandemic severities, in the event that the pandemic is caused by SARS-X, with return time given in years, so that, for example, a pandemic with a return time of 30 years has an annual probability to occur of  $1/30$ .

1369 **C.2.5.1 Composition of estimated impacts** Our results are aggregate  $\Delta$ LIRs of  
1370 advance investments, summing over types of societal loss and then over country samples. We  
1371 evaluate where investments result in greatest gains by examining their compositions. Figure  
1372 C.12 shows the composition of the  $\Delta$ LIR of investments in terms of country income levels and  
1373 types of loss. Bars show the median % contribution to the  $\Delta$ LIR of each investment scenario.  
1374 We find that much of the  $\Delta$ LIR of advance investments is realised via averted losses of lives,  
1375 with a lesser economic gain due to earlier lifting of closures, measured by short-term GDP  
1376 and long-term gains from education. The distribution of  $\Delta$ LIR across country types varies  
1377 across scenarios. Blue reference lines in Figure C.12 (right) indicate  $\Delta$ LIR attributable to  
1378 LLMIC proportional to population size. Thus there is an increase in equality as a consequence  
1379 of investments in some but not all scenarios.

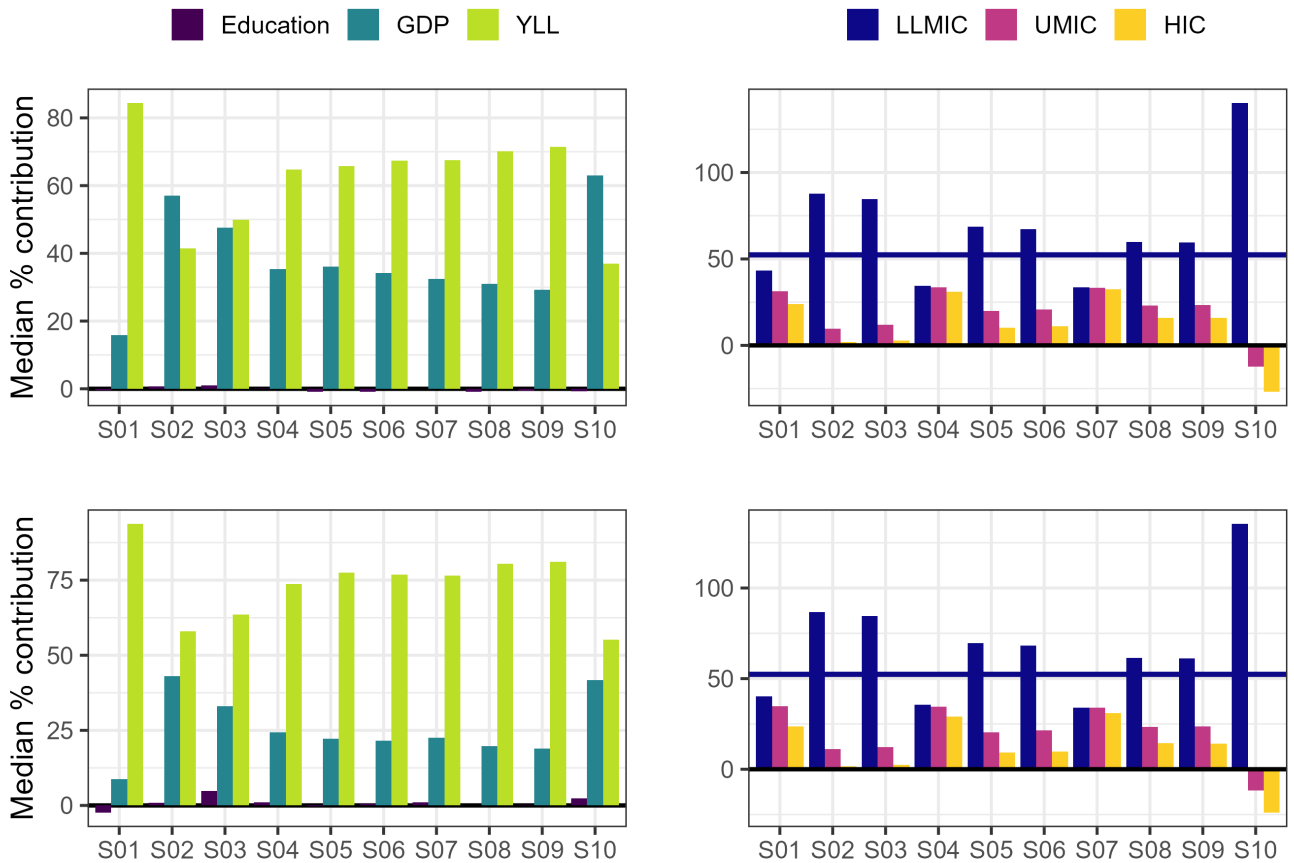

Figure C.12: Composition of  $\Delta LIR$  of investments across types of societal loss (left), and country types (right), and conditional on a once-in-thirty-years event (top) and a once-in-one-hundred-years event (bottom) caused by SARS-X. Horizontal navy lines indicate the proportion of the world's population living in an LIC or LMIC. Where the LLMIC bar reaches this line, the  $\Delta LIR$  of investments realised in LLMIC is proportional to population.

## References

- 1380  
1381 1. CEPI. Broadly Protective Coronavirus Vaccines. [https://cepi.net/broadly-](https://cepi.net/broadly-protective-coronavirus-vaccines)  
1382 protective-coronavirus-vaccines. 2026
- 1383 2. U.S. BLS. CPI Inflation Calculator. 2025
- 1384 3. Griffiths U et al. Costs of Delivering COVID-19 Vaccine in 92 AMC Countries.  
1385 [https://www.who.int/publications/m/item/costs-of-delivering-covid-19-vaccine-](https://www.who.int/publications/m/item/costs-of-delivering-covid-19-vaccine-in-92-amc-countries)  
1386 in-92-amc-countries. 2021
- 1387 4. Kis Z. Process-Cost Modelling for Producing 100 Million COVID-19 mRNA Vaccine  
1388 Doses per Year at Injectable Medicines Manufacturing Sites. [https://msfaccess.org/](https://msfaccess.org/sites/default/files/2021-09/COVID19_TechBrief_Process_cost_modelling_ENG.pdf)  
1389 sites/default/files/2021-09/COVID19\_TechBrief\_Process\_cost\_modelling\_  
1390 ENG.pdf. 2021
- 1391 5. World Health Organization. Public Assessment Summary Report: Ervebo™,  
1392 Ebola Zaire Vaccine (rVSVΔG-ZEBOV-GP, Live), Merck & Co., Inc. USA. Tech.  
1393 rep. World Health Organization, 2019 Dec :3
- 1394 6. Pfizer. Pfizer and the European Commission Enter into Manufacturing Reservation  
1395 Agreement for mRNA-based Vaccines to Help Protect Against Future Pandemics.  
1396 [https://www.pfizer.com/news/announcements/pfizer-and-european-commission-](https://www.pfizer.com/news/announcements/pfizer-and-european-commission-enter-manufacturing-reservation-agreement-mrna)  
1397 enter-manufacturing-reservation-agreement-mrna. 2023 Jun
- 1398 7. PR Newswire. Seqirus and U.S. Government Renew Multi-Year Agreement for  
1399 Influenza Pandemic Preparedness and Response. Summit, NJ, 2022 Feb
- 1400 8. Martuscelli C. EU Buys Vaccine Capacity to Prepare for next Pandemic. Politico  
1401 2023 Jun
- 1402 9. Linksbridge SPC. Global Vaccine Market Model. [https://www.linksbridge.com/](https://www.linksbridge.com/casestudy-gvmm)  
1403 casestudy-gvmm. 2025
- 1404 10. U.S. Government Accountability Office. Drug Industry: Profits, Research and  
1405 Development Spending, and Merger and Acquisition Deals. [https://www.gao.](https://www.gao.gov/products/gao-18-40)  
1406 gov/products/gao-18-40. 2017

- 1407 11. Gotham D, Barber MJ, and Hill AM. Estimation of Cost-Based Prices for Injectable  
1408 Medicines in the WHO Essential Medicines List. *BMJ Open* 2019 Sep; 9:e027780.  
1409 DOI: 10.1136/bmjopen-2018-027780
- 1410 12. Oyatoye I. Costs and Financing Gap of Delivering COVID-19 Vaccine to 133  
1411 Low- and Middle-Income Countries. [https://immunizationeconomics.org/wp-](https://immunizationeconomics.org/wp-content/uploads/2024/01/Ibironke-Oyatoye-Costs-and-financing-gap-of-C19v-delivery-in-LMICS_Final.pdf)  
1412 [content/uploads/2024/01/Ibironke-Oyatoye-Costs-and-financing-gap-of-C19v-](https://immunizationeconomics.org/wp-content/uploads/2024/01/Ibironke-Oyatoye-Costs-and-financing-gap-of-C19v-delivery-in-LMICS_Final.pdf)  
1413 [delivery-in-LMICS\\_Final.pdf](https://immunizationeconomics.org/wp-content/uploads/2024/01/Ibironke-Oyatoye-Costs-and-financing-gap-of-C19v-delivery-in-LMICS_Final.pdf). Cape Town, South Africa, 2023 Jul
- 1414 13. Moi F, Boonstoppel L, Archer R, and Akilimali P. The Cost of Delivering COVID-  
1415 19 Vaccines in the Democratic Republic of the Congo. Tech. rep. Geneva: ThinkWell,  
1416 2024 Apr
- 1417 14. Ruisch A et al. The Cost of Delivering COVID-19 Vaccines in Four Districts  
1418 in Malawi. *Cost Effectiveness and Resource Allocation* 2025 Jul; 23:36. DOI:  
1419 10.1186/s12962-025-00610-2
- 1420 15. Namalela T et al. The Cost of Delivering COVID-19 Vaccines in Mozambique: A  
1421 Bottom-up Costing Study. *BMC Health Services Research* 2025 Apr; 25:521. DOI:  
1422 10.1186/s12913-025-12671-3
- 1423 16. Tumusiime C et al. The Cost of Delivering COVID-19 Vaccines in Kampala,  
1424 Uganda. Tech. rep. Uganda: ThinkWell, 2024
- 1425 17. Yesmin A et al. The Cost of COVID-19 Vaccine Delivery in Bangladesh. *Human*  
1426 *Vaccines & Immunotherapeutics* 2024 Dec; 20:2411820. DOI: 10.1080/21645515.  
1427 2024.2411820
- 1428 18. Vaughan K, Smith E, Schütte C, Moi F, and Boonstoppel L. The Cost of Delivering  
1429 COVID-19 Vaccines in Côte d'Ivoire. Tech. rep. ThinkWell & Genesis Analytics,  
1430 2023 Jul
- 1431 19. Noh DH et al. Cost of COVID-19 Vaccine Delivery in Nine States in Nigeria via  
1432 the U.S. Government Initiative for Global Vaccine Access. *BMC Health Services*  
1433 *Research* 2024 Oct; 24:1232. DOI: 10.1186/s12913-024-11645-1

- 1434 20. Banks C et al. The Cost of Delivering COVID-19 Vaccines in the Philippines.  
1435 Tech. rep. Geneva: ThinkWell, 2023
- 1436 21. Nguyen VM et al. The Cost of Delivering COVID-19 Vaccines in Vietnam. BMC  
1437 Health Services Research 2024 Jul; 24:779. DOI: 10.1186/s12913-024-11202-w
- 1438 22. Nonvignon J et al. Estimating the Cost of COVID-19 Vaccine Deployment and  
1439 Introduction in Ghana Using the CVIC Tool. Vaccine 2022 Mar; 40:1879–87. DOI:  
1440 10.1016/j.vaccine.2022.01.036
- 1441 23. Yeung KHT et al. Estimating the Delivery Costs of COVID-19 Vaccination Using  
1442 the COVID-19 Vaccine Introduction and Deployment Costing (CVIC) Tool: The  
1443 Lao People’s Democratic Republic Experience. BMC Medicine 2023 Jul; 21:248.  
1444 DOI: 10.1186/s12916-023-02944-1
- 1445 24. Orangi S, Kairu A, Ngatia A, Ojal J, and Barasa E. Examining the Unit Costs of  
1446 COVID-19 Vaccine Delivery in Kenya. BMC Health Services Research 2022 Dec;  
1447 22:439. DOI: 10.1186/s12913-022-07864-z
- 1448 25. Vaughan K, Mokena OT, Rankgoane-Pono G, Keetile M, and Griffiths UK. Costs  
1449 of Delivering COVID-19 Vaccine in Botswana during the Height of the Pandemic:  
1450 A Retrospective Study. BMC Health Services Research 2025 Mar; 25:405. DOI:  
1451 10.1186/s12913-025-12455-9
- 1452 26. Edeka I et al. Costs of the COVID-19 Vaccination Programme: Estimates from the  
1453 West Rand District of South Africa, 2021/2022. BMC Health Services Research  
1454 2024 Jul; 24:857. DOI: 10.1186/s12913-024-11251-1
- 1455 27. Kis Z and Rizvi Z. How to Make Enough Vaccine for the World in One Year.  
1456 [https://www.citizen.org/article/how-to-make-enough-vaccine-for-the-world-in-](https://www.citizen.org/article/how-to-make-enough-vaccine-for-the-world-in-one-year)  
1457 [one-year](https://www.citizen.org/article/how-to-make-enough-vaccine-for-the-world-in-one-year). 2021
- 1458 28. Vaccines Europe. Vaccines Europe Analysis of Vaccine Production Lead Times.  
1459 2024

- 1460 29. Feddema JJ, Fernald KD, Schikan HG, and Van De Burgwal LH. Upscaling Vaccine  
1461 Manufacturing Capacity - Key Bottlenecks and Lessons Learned. *Vaccine* 2023  
1462 Jul; 41:4359–68. DOI: 10.1016/j.vaccine.2023.05.027
- 1463 30. Gouglas D et al. Estimating the Cost of Vaccine Development against Epidemic  
1464 Infectious Diseases: A Cost Minimisation Study. *The Lancet Global Health* 2018  
1465 Dec; 6:e1386–e1396. DOI: 10.1016/S2214-109X(18)30346-2
- 1466 31. Lo AW, Siah KW, and Wong CH. Estimating Probabilities of Success of Vaccine  
1467 and Other Anti-Infective Therapeutic Development Programs. *Harvard Data  
1468 Science Review* 2020 May. DOI: 10.1162/99608f92.e0c150e8
- 1469 32. CEPI. Delivering Pandemic Vaccines in 100 Days. [https://static.cepi.net/  
1470 downloads/2024-02/CEPI-100-Days-Report-Digital-Version\\_29-11-22.pdf](https://static.cepi.net/downloads/2024-02/CEPI-100-Days-Report-Digital-Version_29-11-22.pdf). 2022
- 1471 33. CEPI. CEPI 2022–2026 Strategy. [https://static.cepi.net/  
1472 downloads/2023-12/CEPI-2022-2026-Strategy-v3-Jan21\\_0.pdf](https://static.cepi.net/downloads/2023-12/CEPI-2022-2026-Strategy-v3-Jan21_0.pdf). 2021
- 1473 34. Glennerster R, Snyder CM, and Tan BJ. Calculating the Costs and Benefits of  
1474 Advance Preparations for Future Pandemics. Vol. 71. Palgrave Macmillan UK,  
1475 2023. DOI: 10.1057/s41308-023-00212-z
- 1476 35. Kazaz B, Webster S, and Yadav P. Incentivizing COVID-19 Vaccine Developers  
1477 to Expand Manufacturing Capacity. [https://www.cgdev.org/sites/default/files/  
1478 incentivizing-covid-19-vaccine-developers-expand-manufacturing-capacity.pdf](https://www.cgdev.org/sites/default/files/incentivizing-covid-19-vaccine-developers-expand-manufacturing-capacity.pdf).  
1479 2021
- 1480 36. UN. World Population Prospects 2024, Online Edition. 2024
- 1481 37. The Network for Greening the Financial System. NGFS Climate Scenarios for Cen-  
1482 tral Banks and Supervisors - Phase V. [https://www.ngfs.net/en/publications-and-  
1483 statistics/publications/ngfs-climate-scenarios-central-banks-and-supervisors-  
1484 phase-v](https://www.ngfs.net/en/publications-and-statistics/publications/ngfs-climate-scenarios-central-banks-and-supervisors-phase-v). 2024 Nov
- 1485 38. Intergovernmental Panel on Climate Change Working Group 3. Climate Change  
1486 2014: Mitigation of Climate Change. Cambridge and New York: Cambridge Uni-  
1487 versity Press

- 1488 39. Newman R and Noy I. The Global Costs of Extreme Weather That Are Attributable  
1489 to Climate Change. *Nature Communications* 2023 Sep; 14:6103. DOI: 10.1038/  
1490 s41467-023-41888-1
- 1491 40. van Essen H et al. Handbook on the External Costs of Transport. Luxembourg:  
1492 Publications Office of the European Union, 2020. ISBN: 978-92-76-18184-2
- 1493 41. HM Treasury. The Green Book. 2022
- 1494 42. Sunstein CR. Valuing Life: Humanizing the Regulatory State. Chicago: The  
1495 University of Chicago Press, 2014. ISBN: 978-0-226-78017-7
- 1496 43. Broome J. The Value of Life in the Social Cost of Carbon: A Critique and a Proposal.  
1497 *Journal of Benefit-Cost Analysis* 2024; 15:110–26. DOI: 10.1017/bca.2024.21
- 1498 44. UN General Assembly. Resolution 217A (III), Universal Declaration of Human  
1499 Rights, A/RES/217(III). 1948 Dec
- 1500 45. Marani M, Katul GG, Pan WK, and Parolari AJ. Intensity and Frequency of  
1501 Extreme Novel Epidemics. *Proceedings of the National Academy of Sciences of  
1502 the United States of America* 2021; 118. DOI: 10.1073/pnas.2105482118
- 1503 46. The Economist. The Pandemic’s True Death Toll. [https://www.economist.com/  
1504 graphic-detail/coronavirus-excess-deaths-estimates](https://www.economist.com/graphic-detail/coronavirus-excess-deaths-estimates). 2024 Jun
- 1505 47. Hashemi Shahraki A, Carniel E, and Mostafavi E. Plague in Iran: Its History  
1506 and Current Status. *Epidemiology and Health* 2016 Jul; 38:e2016033. DOI:  
1507 10.4178/epih.e2016033
- 1508 48. Walker PG et al. The Impact of COVID-19 and Strategies for Mitigation and  
1509 Suppression in Low- and Middle-Income Countries. *Science* 2020; 369:413–22. DOI:  
1510 10.1126/science.abc0035
- 1511 49. Doohan P et al. Mitigating Future Respiratory Pandemics in Low-, Middle- and  
1512 High-Income Countries: A Modelling Study of Health, Economic and Educational  
1513 Losses. 2026. DOI: 10.21203/rs.3.rs-9418446/v
- 1514 50. Piburn J. Wbstats: Programmatic Access to the World Bank API. Oak Ridge  
1515 National Laboratory. Oak Ridge, Tennessee, 2020

- 1516 51. Feenstra RC, Inklaar R, and Timmer MP. The Next Generation of the Penn World  
1517 Table. *American Economic Review* 2015; 105:3150–82
- 1518 52. UN Tourism. Key Tourism Statistics. 2023
- 1519 53. UN Tourism. International Tourism and COVID-19. 2023
- 1520 54. Jarvis CI et al. Social Contact Patterns Following the COVID-19 Pandemic: A  
1521 Snapshot of Post-Pandemic Behaviour from the CoMix Study. *Epidemics* 2024  
1522 Sep; 48:100778. DOI: 10.1016/j.epidem.2024.100778
- 1523 55. Tatar M et al. COVID-19 Vaccine Inequality: A Global Perspective. *Journal of*  
1524 *Global Health* 2022 Oct; 12:03072. DOI: 10.7189/jogh.12.03072
- 1525 56. Johnson R et al. Costs and Impacts of Vaccine Preparedness Investments for  
1526 SARS-X Pandemics: DAEDALUS Code and Model Description. [https://github.](https://github.com/robject411/p2_drivers)  
1527 [com/robject411/p2\\_drivers](https://github.com/robject411/p2_drivers). 2026
